# 1 **A stochastic world model on gravity for stability inference**

2

3 **Authors: Taicheng Huang<sup>1</sup>, Jia Liu<sup>1\*</sup>**

4

5 <sup>1</sup>Department of Psychology and Tsinghua Laboratory of Brain & Intelligence,  
6 Tsinghua University, Beijing, China.

7 \* Correspondence to: [liujiathu@tsinghua.edu.cn](mailto:liujiathu@tsinghua.edu.cn) (J. Liu).

8

## 9 **Abstract**

10 The fact that objects without proper support will fall to the ground is not only a  
11 natural phenomenon, but also common sense in mind. Previous studies suggest that  
12 humans may infer objects' stability through a world model that performs mental  
13 simulations with *a priori* knowledge of gravity acting upon the objects. Here we  
14 measured participants' sensitivity to gravity's direction, the most critical parameter of  
15 gravity in stability inference, to investigate how the world model works. We found  
16 that the world model was not a faithful replica of Newton's law of gravity but rather  
17 encoded gravity's direction as a Gaussian distribution, with the vertical direction as  
18 the maximum likelihood. The world model with this stochastic feature fit nicely with  
19 participants' subjective sense of objects' stability and explained the illusion that taller  
20 objects are perceived as more likely to fall. Furthermore, a computational model with  
21 reinforcement learning revealed that the stochastic feature likely originated from  
22 agent-environment interaction, and computer simulations illustrated the ecological  
23 advantage of the stochastic over deterministic representation of gravity's direction in  
24 balancing accuracy and speed for efficient stability inference. In summary, the  
25 stochastic world model on gravity provides an example of how *a priori* knowledge of  
26 the physical world is implemented in the brain that helps humans operate flexibly in  
27 open-ended environments.

28

29

30

31

## 32 **Introduction**

33 About two thousand years ago, Confucius warned his disciples that a wise man should  
34 not stand next to a collapsing wall. We, wise or not, can easily judge whether a wall is  
35 stable or collapsing in a fraction of a second (Battaglia et al., 2013; Kubricht et al.,  
36 2017; McCloskey, 1983). This astonishing performance is unlikely to have been  
37 achieved by previous visual experience alone. Taking a stack consisting of ten blocks  
38 as an example (Fig. 1), we can quickly report its stability with a satisfactory accuracy  
39 of 70% on average (Bear et al., 2021; Zhang et al., 2016), but the universal cardinality  
40 of possible configurations is at least  $3.72 \times 10^{19}$  (Extended Data Fig. 1), which is much  
41 larger than the total number of sand grains on Earth (est.  $7.5 \times 10^{18}$ ) (Blatner, 2013).  
42 Contrary to this intuition, four-month-old infants, who have a little visual experience  
43 of the physical world, expect a box to fall if it loses contact with a support platform  
44 (Baillargeon, 1994, 2004). Our minds may therefore have devised a mechanism that  
45 differs from the widely used discriminative approach in artificial neural networks,  
46 which relies on the extensive visual experience of objects and feedback about their  
47 stability (Bear et al., 2021; Li et al., 2016; Zhang et al., 2016).

48 Indeed, both behavioral and neuroimaging studies have suggested that humans  
49 possess *a priori* knowledge of Newton's law of physics in the mind. For example,  
50 infants as young as seven months expect a downward moving object to accelerate and  
51 an upward moving object to decelerate (Friedman, 2002; Kim & Spelke, 1999), and  
52 adults can estimate the remaining time to catch a moving ball (McIntyre et al., 2001;  
53 Zago & Lacquaniti, 2005) even in the absence of visual information (Lacquaniti &  
54 Maioli, 1989; Zago et al., 2009). Further fMRI studies have revealed the parieto-  
55 insular vestibular cortex in the brain as the neural basis for gravity-based stability  
56 inference, suggesting that this knowledge is encapsulated as a cognitive module  
57 (Fischer et al., 2016; Indovina et al., 2005; Pramod et al., 2022). Accordingly, our  
58 brain is proposed as a set of generative machines that actively predict future events of  
59 the ever-changing physical world through mental simulation with *a priori* knowledge  
60 acting upon the world (Battaglia et al., 2013; Hegarty, 2004; Huang & Rao, 2011;  
61 Tenenbaum et al., 2011; Ullman et al., 2017). For this reason, the generative machine  
62 is also called the world model (Land, 2014; Tenenbaum et al., 2011).

63 Recently, the idea of the world model has become popular to explain the  
64 predictive nature of the brain (Friston et al., 2021) and to improve the generality and

65 robustness of the artificial neural networks (Matsuo et al., 2022). However, how *a*  
66 *priori* knowledge is implemented in the world model remains to be determined. A  
67 widely adopted but not rigorously tested assumption is that the world model in the  
68 brain is a faithful replica of the physical laws of the world (Allen et al., 2020;  
69 Battaglia et al., 2013; Lake et al., 2017; Zhou et al., 2022). For example, the direction  
70 of gravity encoded in the world model, which is the most critical parameter for  
71 stability inference, is assumed to be straightly downward, the same as the direction of  
72 gravity in the physical world. Alternatively, there is a consensus that the brain  
73 actively correlates, integrates, and comprehends the data from sensory organs (e.g.,  
74 electromagnetic waves from the eyes) and adds meaning to them (i.e., color).  
75 Therefore, the representation of the world in the brain may not be the same as reality.  
76 Here, we investigated these two alternative hypotheses for the construction of the  
77 world model in the brain by examining how gravity's direction was represented in the  
78 world model when participants judged the stability of objects.

79 To do this, we measured participants' sensitivity to gravity's direction in a  
80 stability inference task (Battaglia et al., 2013) and found that gravity's direction was  
81 encoded in a Gaussian distribution, with the vertical direction as the maximum  
82 likelihood. This stochastic parameter was then built into the world model to simulate  
83 the displacement of blocks in a stack under the force of gravity, and the simulation  
84 result fits nicely with participants' judgment of stacks' stability and explained the  
85 daily illusion that taller objects are perceived as more like to fall. A computational  
86 model with a reinforcement learning algorithm was devised to reveal its origin  
87 through interactions with the physical world. Finally, we explored the ecological  
88 advantage of the stochastic feature of the world model.

89  
90  
91  
92  
93

## 94 **Results**

### 95 **The direction of gravity in the world model**

96 The direction of gravity is perpendicular to the ground surface. Here, we first tested  
97 humans' sensitivity to gravity's direction to investigate how faithfully our gravity is  
98 represented in the world model compared to gravity in the physical world. To do this,  
99 we used Pybullet (Coumans & Bai, 2016), a forward physics simulator, to manipulate  
100 gravity's direction. Then, we asked the participants to judge whether the collapse  
101 trajectories of unstable stacks were normal (Fig 1a, Supplementary Movie S1). The  
102 direction of simulated gravity was measured by a parameter pair ( $\theta$ ,  $\varphi$ ) (Fig 1b),  
103 which determines the deviation of the direction of simulated gravity from the  
104 direction of gravity in the physical world. Specifically,  $\theta$  is the vertical component of  
105 the direction that affects the degree of collapse, and  $\varphi$  is the horizontal component  
106 that determines the orientation of collapse. We collected participants' judgment of the  
107 normality of collapse trajectories while varying  $\theta$  from 0 to 45° and  $\varphi$  from 0° to 360°  
108 across the force space, and the normality ratio of the judgment for each angle pair was  
109 used to index participants' sensitivity to gravity's direction (Fig 1c). As expected,  
110 when  $\theta$  is equal to 0 (i.e., the direction of the simulated gravity is the direction of the  
111 natural gravity), the participants were likely to report that the collapse trajectory was  
112 normal (accuracy: 91.0%, STD: 8.0%). Then, the critical question is how participants'  
113 subjective sense about the normality of collapse trajectories changes as a function of  
114  $\theta$ . If our world model on gravity is a faithful replica of the physical reality, we should  
115 expect the immediate detection of abnormality when  $\theta$  is away from 0.  
116

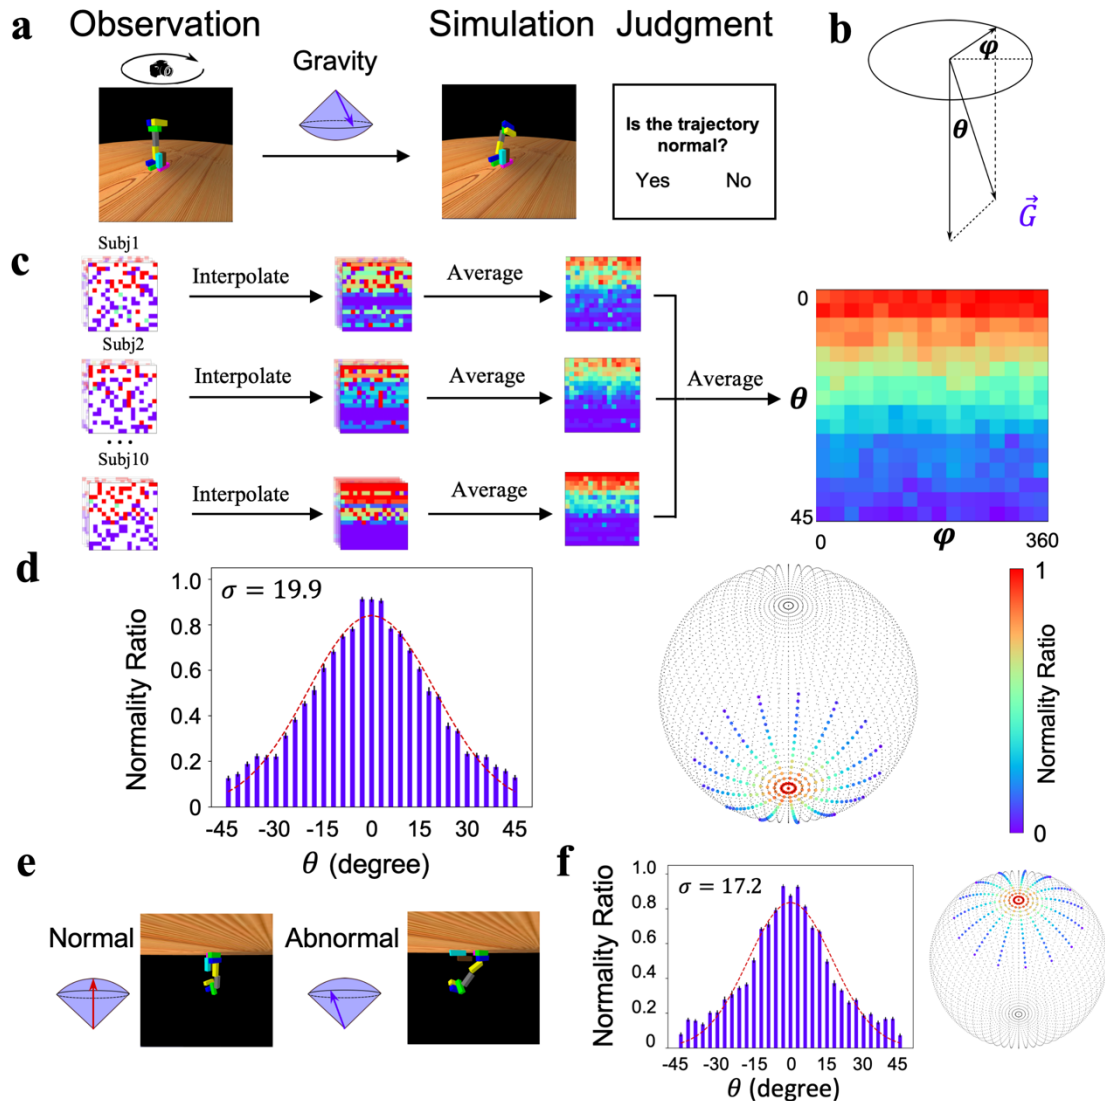

117

118 **Fig 1. Gravity's direction in the world model.** a) The design of the behavioral experiment. Left: A  
 119 rotating camera was used to rotate a stack 360° to display the 3-dimensional appearance of the  
 120 configuration. Middle: Gravity's direction was randomly sampled from a spherical surface. Right: The  
 121 physics simulator simulated the collapse trajectory of the stack under this selected direction, and  
 122 participants reported whether the collapse trajectory was normal. b) The spherical surface of gravity's  
 123 direction was determined by two parameters  $\theta$  and  $\varphi$ . c) The procedure of calculating the normality  
 124 ratio as the function of angle pairs. Left: Each cell represents the response of normality for an angle  
 125 pair within a run. Middle: Responses for unsampled pairs were interpolated with the averaged  
 126 responses along  $\varphi$ . Right: The normality ratio for each angle pair was calculated by averaging  
 127 responses across runs and participants. d) Left: Gravity's direction encoded in the world model follows  
 128 a Gaussian distribution with the vertical direction as the maximum likelihood. Note that the normality  
 129 ratios for  $\theta > 0$  were sampled from  $\varphi \in (0^\circ, 180^\circ)$ , and for  $\theta < 0$  were sampled from  $\varphi \in (180^\circ, 360^\circ)$ .  
 130 Right: The sphere represents the space of gravity's direction, with two poles pointing upward and  
 131 downward, respectively. Each dot in the sphere represents one angle pair, and the color on a dot  
 132 indicates the likelihood that the collapse trajectory under this gravity direction was judged normal. e) In  
 133 a new setting, gravity's direction is reversed. Left: An example collapse trajectory when gravity's

134 direction was upward. Right: A trajectory when the direction was away from the vertical upward. f)  
135 Gravity's direction encoded in the world model when gravity's direction in the physical world was  
136 reversed. Error bar: standard error.

137

138 Contrary to this intuition, the subjective sense of the abnormality was not  
139 immediately apparent as  $\theta$  moved away from 0; instead, the rate of reporting  
140 normality of collapse trajectories decreased gradually as a function of  $\theta$ , which was  
141 the best fit by a Gaussian function with  $\sigma = 19.9$  (Fig. 1d left). That is, the  
142 participants were 50.9% confident in reporting a normal collapse trajectory when the  
143 vertical offset of  $\theta$  was  $19.9^\circ$ . In addition, accuracy in detecting the abnormality was  
144 not affected by  $\varphi$  (Extended Data Fig. 2), consistent with the uniformly distributed  
145 gravitational field in the physical world. This pattern was observed for all participants  
146 tested, with  $\sigma$  varying from 11.1 to 37.1 (Extended Data Fig. 2). Therefore, the world  
147 model on gravity is unlikely to be a faithful replica of the physical world; instead, it  
148 encodes gravity's direction as a Gaussian distribution with the vertical direction as the  
149 maximum likelihood (Fig 1d right).

150 To further test whether the world model on gravity, once established, is  
151 encapsulated from visual experience and task context, we inverted the virtual  
152 environment upside down with gravity's direction pointing upward, and then asked  
153 the same group of participants to judge whether collapse trajectories were normal (Fig  
154 1e, see Supplementary Movie S2). We found that the normality ratio also decreased  
155 gradually as a function of  $\theta$  (Fig. 1f,  $\sigma = 17.2$ ; Extended Data Fig 3 for each  
156 participant), which was not significantly different from that in the environment with  
157 gravity pointing downward. Indeed, each participant's  $\sigma$  in the upright condition was  
158 in high agreement with the  $\sigma$  in the upside-down condition ( $r = 0.91$ ,  $p < 0.01$ ). That  
159 is, the visual experience and task context apparently did not cognitively penetrate  
160 humans' world model on gravity, suggesting that it is likely encapsulated as a  
161 cognitive module.

162 How does the stochastic gravity's direction in the world model affect our  
163 inference on objects' stability? To answer this question, we recruited an independent  
164 group of participants to estimate the stability of 60 stacks of different configurations  
165 (Fig 2a), half of which were stable. During the experiment, the participants were  
166 required to judge how stable each stack was on a 0-7 scale without feedback, which  
167 was used to index their subjective sense about stacks' stability. Two world models

168 were constructed for comparison. One world model was equipped with a vertically  
169 downward direction of gravity without any stochastic variance. This deterministic  
170 model is intended to simulate how the stacks fell in the real world, and is therefore  
171 called a natural gravity simulator (NGS) (Fig 2b top). The other model is the same as  
172 the NGS, except that the deterministic direction of gravity in the NGS was replaced  
173 by the stochastic direction obtained from the previous psychophysical experiment.  
174 This model is thus called the mental gravity simulator (MGS, Fig 2c top). Both  
175 models were used to quantify the degree of stability by measuring the proportion of  
176 unmoved blocks after the collapse, where the proportion of unmoved blocks after the  
177 simulation was used to estimate the stability of the stacks.

178 NGS-estimated stability was significantly correlated with participants'  
179 subjective sense (Fig 2b bottom;  $r = 0.70$ ,  $p < 0.01$ ), consistent with previous findings  
180 (Battaglia et al., 2013). However, the participants were more inclined to judge stacks  
181 as more likely to collapse, as the dots in Fig 2b are more concentrated on the lower  
182 side of the diagonal line. This phenomenon is referred to as the inference bias, which  
183 was indexed as the difference in stability estimates between the participants and the  
184 NGS (inference bias =  $-0.31$ ,  $p < 0.01$ ) (see Methods). In other words, the participants  
185 were unlikely to infer stacks' stability from simulations with a deterministic direction  
186 of gravity pointing vertically downward. In contrast, the MGS randomly sampled  
187 pairs of  $(\theta_s, \varphi_s)$  from the Gaussian distribution as gravity's directions 100 times, and  
188 the estimated stability of a stack was the averaged stability of simulations with  
189 different angle pairs. Aside from a similar magnitude of the correlation in the stability  
190 estimates between the participants and the MGS (Fig 2c bottom;  $r = 0.75$ ,  $p < 0.01$ ),  
191 the MGS, unlike the NGS, perfectly captured participants' judgment of stability  
192 because the points were evenly distributed along the diagonal line (inference bias =  
193  $0.04$ ,  $p > 0.05$ ; see Extended Data Fig. 4 for the agreement when the MGS was  
194 implemented with different Gaussian functions). In other words, the magnitude of the  
195 correlation coefficients is not the only indicator to evaluate the model's fitness. In  
196 short, the world model that represents gravity's direction as a Gaussian distribution  
197 around the vertical direction properly explains our tendency to judge stacks as more  
198 prone to collapse.

199

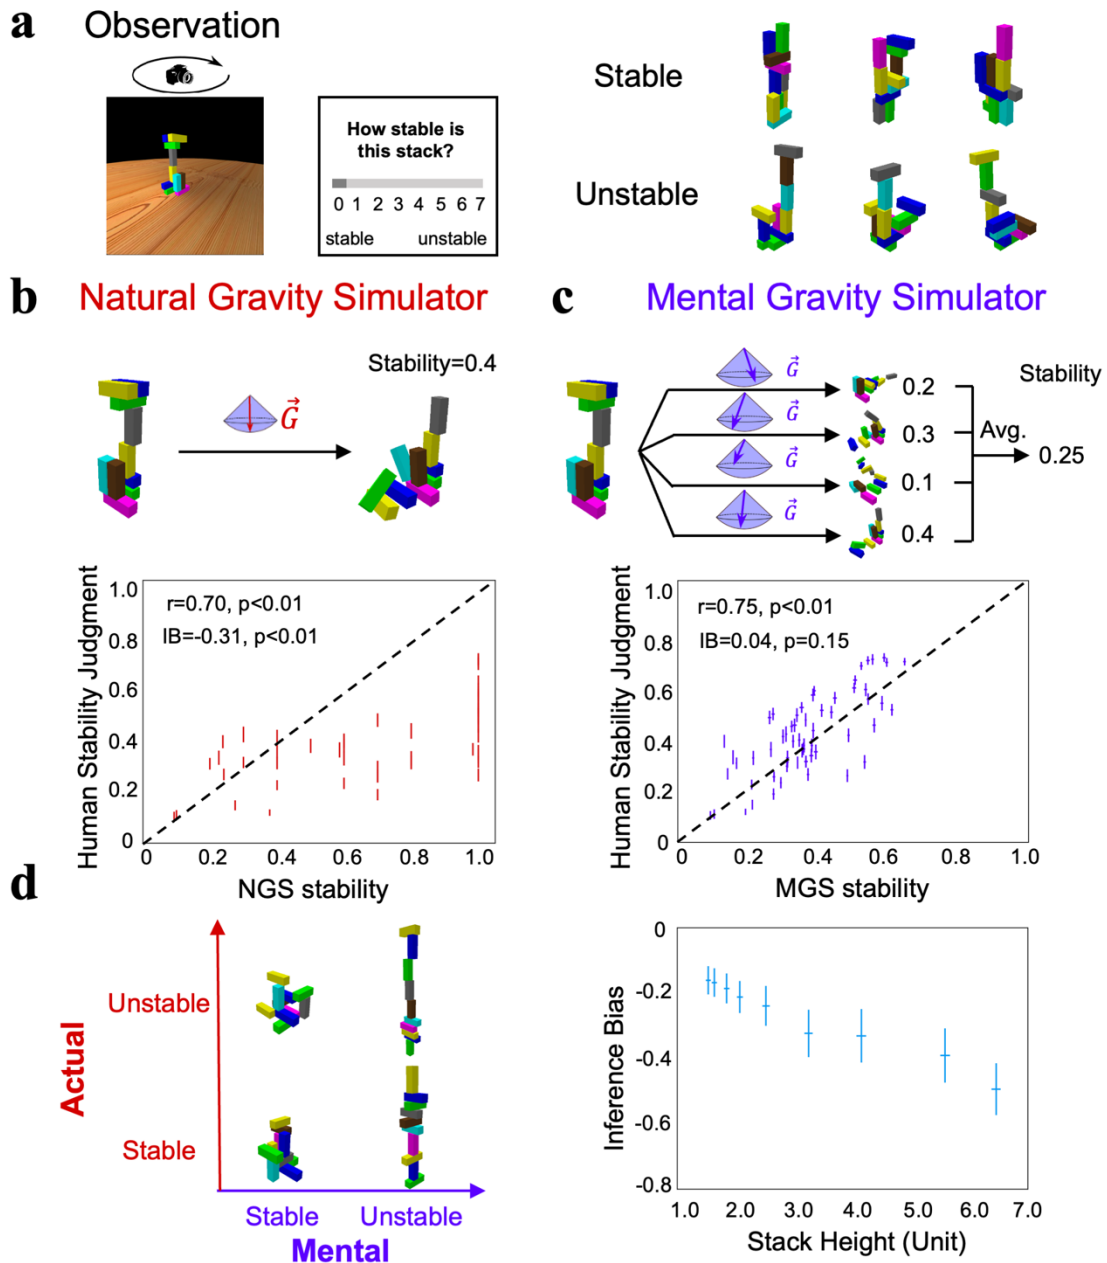

200

201 **Fig 2. Stability inference by the world model on gravity.** a) An experiment to rate the stability of  
 202 stacks, half of which were stable and the other half unstable. b) Top: The procedure of the NGS to  
 203 estimate the actual stability of stacks by simulation, and for unstable stacks the stability was indexed by  
 204 the proportion of displaced blocks. Bottom: The correlation between the stability estimates of the  
 205 participant and those of the NGS. Each dot represents one stack, and the lines denote the standard  
 206 errors. c) Top: The procedure of the MGS, where the stability of a stack was estimated by averaging  
 207 the estimated stabilities from multiple simulations with different gravity directions sampled from the  
 208 Gaussian distribution. Bottom: The correlation between the stability estimates of the participant and  
 209 those of the MGS. d) Left: The illusion that taller objects are perceived as more unstable than shorter  
 210 ones. Right: The inference bias was indexed by the difference between the stability estimated by the  
 211 MGS and that estimated by the NGS. The larger the negative values, the more likely stacks were



212 unstable. The x-axis denotes the height of a stack containing ten blocks, where the height, length, and  
213 width of each block were 1.2, 0.4, and 0.4, respectively. IB: inference bias. Error bar: standard error.  
214

215 The stochastic world model illustrated by the MGS that led to participants'  
216 inference bias may explain the daily illusion that we perceive taller objects to be more  
217 unstable than shorter ones (Fig 2d left). An intuitive explanation from physics is that a  
218 tall object has a higher center of gravity, and thus an external perturbation makes it  
219 more likely to collapse. Our stochastic world model, on the other hand, provides an  
220 alternative explanation without introducing external perturbations, simply because  
221 deviations from gravity's veridical direction are likely to accumulate with the height  
222 of the objects. To test this conjecture, we constructed a set of stacks with different  
223 heights, and estimated the degree of stacks' stability with the MGS and the NGS,  
224 respectively. Because the MGS was considered to be the world model implemented in  
225 the brain, the inference bias here was calculated as the difference in stability estimates  
226 between the MGS and the NGS, with negative values indicating a tendency to judge a  
227 stable stack as an unstable one. Consistent with the inference bias found in humans,  
228 the MGS found stacks of all heights to be more prone to collapse (Fig 2d right;  
229 inference bias  $< 0$ ,  $p < 0.01$  for all heights). Critically, the bias increased  
230 monotonically with increasing height, consistent with the illusion that taller objects  
231 are considered more prone to collapse (see Extended Data Fig. 5 for the inference bias  
232 when the MGS was equipped with different levels of deviation). In short, the  
233 stochastic world model on gravity provides a more concise explanation for the daily  
234 illusion that taller objects are perceived as more likely to collapse, without assuming  
235 external perturbations.

236

### 237 **The origin of the stochastic feature of the world model**

238 A deterministic model that combines gravity's veridical direction with external  
239 perturbations, such as an external force or perceptual uncertainty (Allen et al., 2020;  
240 Battaglia et al., 2013; Lake et al., 2017; Smith & Vul, 2013), is theoretically  
241 equivalent to our stochastic model that represents gravity's direction in a Gaussian  
242 distribution; therefore, it also fits well with humans' inference on stability by fine-  
243 tuning the parameters of external perturbations. Although both the cognitive  
244 impenetrability and the self-consistency without resorting to an external perturbation

245 found in our study favor the stochastic model over the deterministic one, more direct  
246 evidence comes from the origin of the stochastic feature of the world model.

247 Because our intelligence emerges and evolves under the constraints of the  
248 physical world, the stochastic feature may emerge as a biological agent interacts with  
249 the environment, where the mismatches between external feedback from the  
250 environment and internal expectations from the world model are in turn used to fine-  
251 tune the world model (Friston et al., 2021; MacKay, 1956; Matsuo et al., 2022). To  
252 simulate this process, here we designed a reinforcement learning (RL) framework to  
253 model this interactive process to illustrate how the world model on gravity evolves  
254 (Fig 3a). Specifically, an agent perceived a stack in the environment, which was then  
255 acted upon by a simulated gravity with direction parameters (i.e.,  $\theta$  and  $\varphi$ ) sampled  
256 from a spherical direction space. The initial probabilities for the sampling directions  
257 were identical (Fig 3b, left). The final state of the stack served as the agent's  
258 expectation under the effect of the simulated gravity. The mismatch between the  
259 expectation and the observed final state of the stack under the natural gravity was  
260 used to update the sampling probability of the direction space, with a larger  
261 discrepancy leading to a larger decrease in probabilities through RL. Within this RL  
262 framework, we constructed 100,000 stacks of 2 to 15 blocks to train the world model  
263 on gravity. As the training progressed, the probabilities of the direction space  
264 gradually converged downward (Fig 3b, middle; see Extended Data Fig. 6 for the  
265 training trajectory). Although gravity's direction in the environment was vertical, the  
266 distribution of updated probabilities in the direction space was gradational ( $\sigma = 21.6$ ;  
267 Fig 3b, right), which is close to gravity's direction represented in the world model  
268 derived from the psychophysics experiment on human participants. Therefore, the  
269 world model representing gravity's direction in a Gaussian distribution can emerge  
270 automatically as the agent interacts with the environment, without the need for any  
271 external perturbation.

272

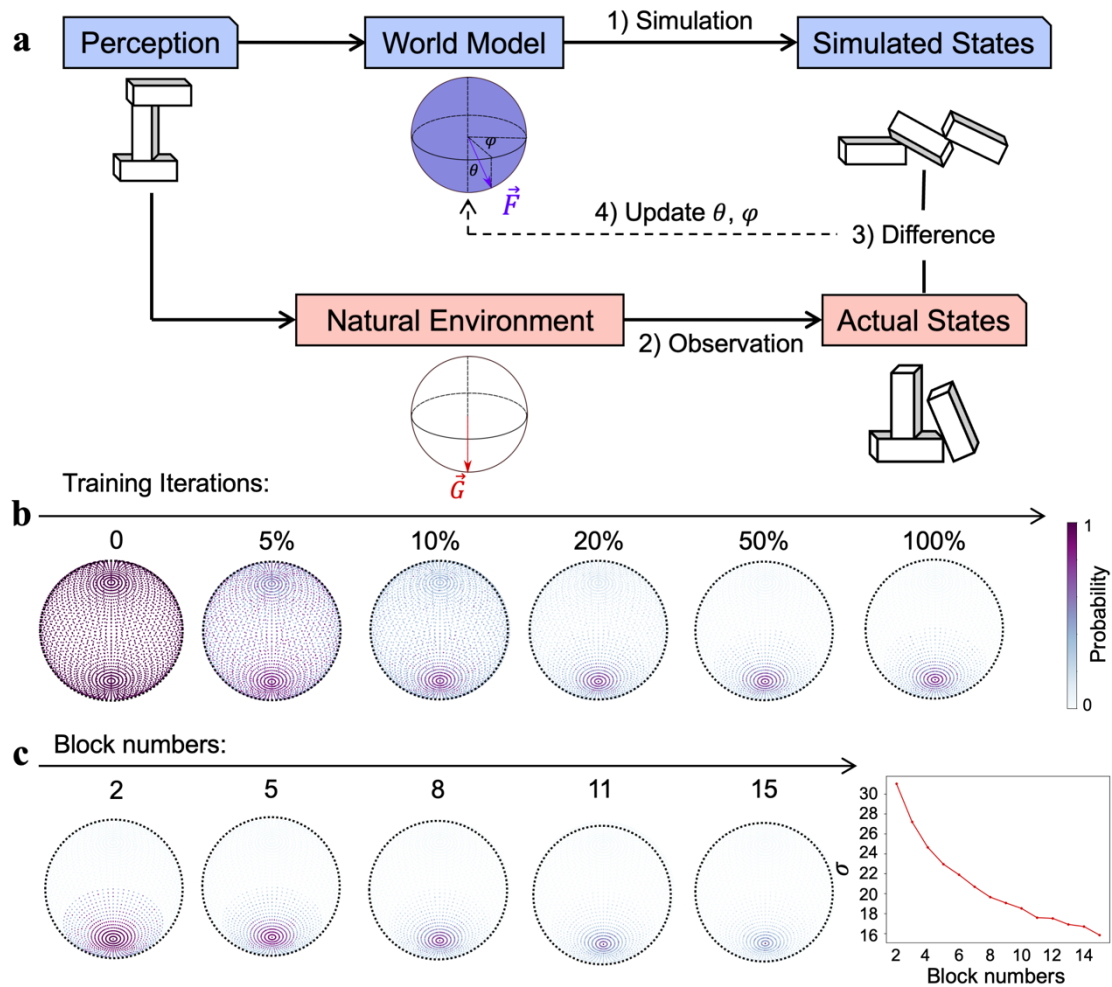

273

274 **Fig 3. The origin of the stochastic feature of gravity's direction.** a) The reinforcement learning  
 275 framework, which updated gravity's direction ( $\theta, \varphi$ ) of the world model by minimizing the difference  
 276 between the expectation from the internal simulation (i.e., simulated states) and the observation from  
 277 the physical world (i.e., actual states). b) Gravity's directions, which were uniformly distributed on the  
 278 spherical surface, gradually converged downward as the training progressed, and eventually stabilized  
 279 in a Gaussian distribution with the vertical direction as the maximum likelihood. Color denotes the  
 280 probability of a parameter pair being adopted as gravity's direction. c) Left: World models constructed  
 281 by reinforcement learning when stacks in the physical world were composed of different numbers of  
 282 blocks ranging from 2 to 15. Right: The variance of the Gaussian distribution, illustrated by the width  
 283 of the distribution of gravity's direction on a spherical surface, monotonically decreased as the number  
 284 of blocks in the stacks increased.

285

286 To further illustrate the idea that the environment constrains the form of  
 287 intelligence, we systematically manipulated the appearance of the physical world  
 288 while holding the natural gravity constant. Specifically, we constructed 14 worlds,  
 289 each containing stacks of the same number of blocks, but with different  
 290 configurations. The number of blocks ranged from 2 to 15. We trained the world

291 model on gravity under the same RL framework for each world, and found that all  
292 world models represented gravity's direction in a Gaussian distribution (Fig 3c left;  
293 see Extended Data Fig. 7 for all world models). However, the width of the  
294 distribution, indexed by the parameter of  $\sigma$ , decreased monotonically as the number of  
295 blocks increased (Fig 3c right). This phenomenon was shown because in general  
296 stacks containing more blocks were more likely to be affected by forces whose  
297 directions were not perpendicular to the ground surface, which provided more  
298 information about gravity, and thus resulted in a more accurate representation of  
299 gravity's direction in the world model. In short, the world model on gravity resonates  
300 with not only the physical law governing the environment, but also the specific  
301 regularities of the environment the agent encountered.

302

### 303 **The ecological advantage of the stochastic world model**

304 When passing a cliff face, we have to be constantly aware of the stability of the rocks  
305 on the cliff. The ideal response would be both accurate and fast, but accuracy and  
306 speed are often difficult to achieve simultaneously. Here we investigated how the  
307 world model on gravity balances these two factors with its stochastic feature. To  
308 answer this question, we used a linear classifier (i.e., logistic regression) to model  
309 humans' decision-making behavior at different stages of the mental simulation.  
310 Specifically, we collected all the position coordinates of a stack's blocks at different  
311 stages of the simulation. The position difference between the intermediate states of  
312 the stack and the initial state provides information about the stability of the stack. For  
313 example, a stable stack should have no difference in the positions of the component  
314 blocks at all simulation stages, and an unstable stack should have a gradually  
315 increasing position difference. If the linear classifier detected the difference in  
316 positions sufficient for the classification at any stage, it classified the stack as  
317 unstable, otherwise stable (Fig 4a). The classification accuracy gradually increased as  
318 the simulation progressed until it reached the asymptote.

319 As expected, for the NGS (i.e., the world model with the deterministic  
320 direction of gravity), the accuracy at the plateau was close to 100% (95.3% on  
321 average, Fig 4b top red box), significantly higher than that for the MGS (80.1% on  
322 average, Fig 4b top blue box) ( $t = 19.59$ ,  $p < 0.001$ ), simply because of the stochastic  
323 feature of gravity's direction. However, the MGS reached the plateau of decision

324 accuracy much faster than the NGS (response time, indexed by the ratio between the  
 325 time to reach the plateau and the time to reach the final stage: 27.1% vs. 75.2%,  $t =$   
 326 15.58,  $p < 0.001$ ) (Fig 4b middle). The same pattern was also observed with different  
 327 variances of the Gaussian distribution (Extended Data Fig. 8). That is, the stochastic  
 328 world model prioritized speed over accuracy, echoing the basic principle of survival:  
 329 fleeing potential danger as quickly as possible, rather than making a perfect decision  
 330 with a dreadful delay. In addition, by integrating the prediction accuracy and the  
 331 response time as a measure of efficiency, we found that the stochastic world model  
 332 provided a better balance between accuracy and speed, with an efficiency  
 333 significantly higher than that provided by the NGS (3.49 vs. 1.32,  $t = 9.12$ ,  $p < 0.001$ ;  
 334 Fig 4b bottom).  
 335

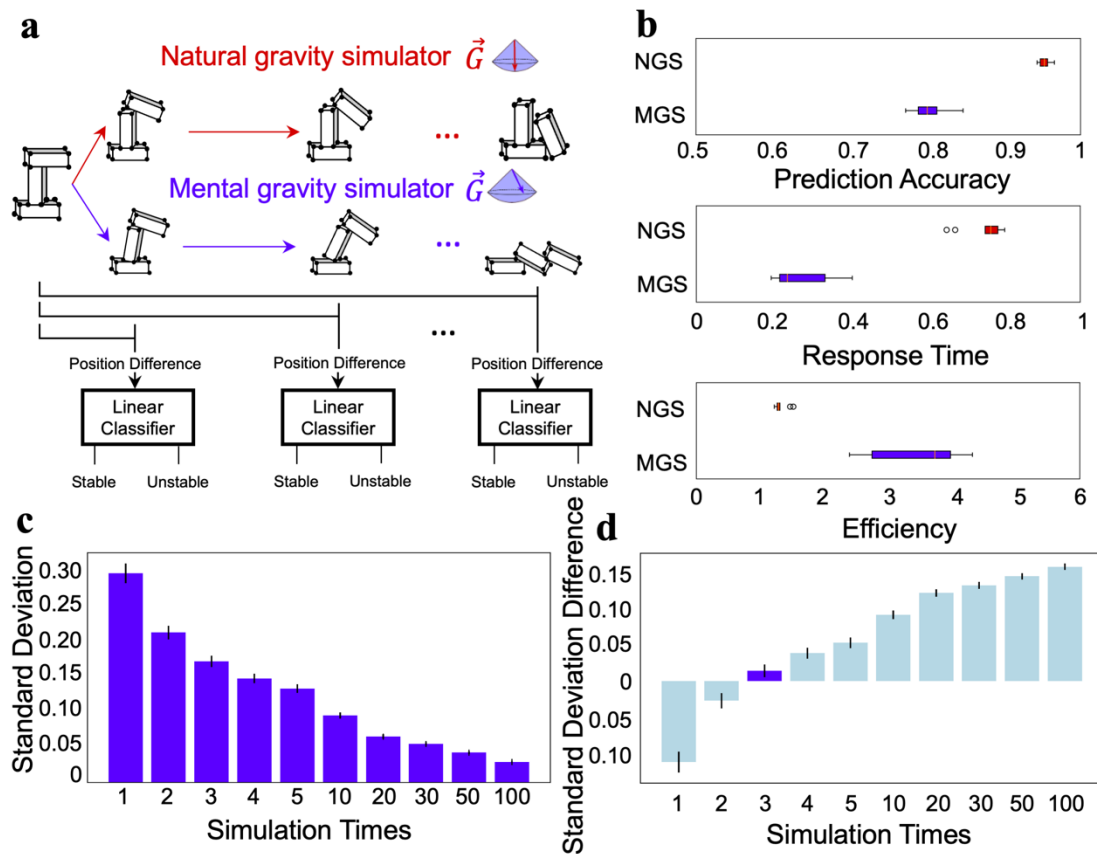

336  
 337 **Fig 4. The ecological advantage of the stochastic feature.** a) Illustration that modeled humans'  
 338 decision-making behavior at different stages of the mental simulation using the NGS and MGS. b) The  
 339 decision of the linear classifier based on the simulation of the MGS was less accurate than that of the  
 340 NGS (top), but the decision was made faster in the MGS than in the NGS (middle). The MGS was  
 341 more efficient than the NGS in combining accuracy and speed (bottom). c) The relationship between  
 342 the number of simulations and the variance of the estimated stability. d) The difference in the variance

343 of the estimated stability between the participants and the MGS. The difference was minimal when the  
344 MGS ran the simulation three times. Error bar: standard error.

345

346 On the other hand, if time permits, multiple simulations with the MGS can  
347 significantly reduce the variance introduced by the stochastic representation of  
348 gravity's direction (Fig 4c). To explore whether humans adopted this strategy of  
349 performing multiple simulations before making a decision, we ran simulations with  
350 the MGS at different numbers of times and then matched them with humans'  
351 performance. We found that the variance of humans' inference on stability best  
352 matched that of the MGS after three simulations (Fig 4d; see Extended Data Fig. 9 for  
353 the model-behavior correspondence under different numbers of simulations).  
354 Therefore, humans are likely to run simulations a limited number of times to infer  
355 stacks' stability.

356

357

358

359

## 360 **Discussion**

361 In this study, we investigated how the physical law of gravity is embodied in the brain  
362 as a world model that guides inferences on objects' stability. A series of  
363 psychophysics experiments showed that the world model on gravity is not a faithful  
364 replica of the physical world, but rather a stochastic model that captures the essence  
365 of the vertically downward direction of gravity as the maximum likelihood of a  
366 Gaussian distribution. The stochastic feature of the world model not only fits humans'  
367 stability inference behavior better than the deterministic model, but also provides new  
368 insight into the daily illusion that taller objects are perceived as more likely to  
369 collapse. We further illustrated how the stochastic feature evolved through  
370 interactions with the environment using reinforcement learning, and well-balanced  
371 accuracy and speed to produce a unique ecological advantage for our survival in the  
372 physical world.

373 About 300 years ago, the philosopher Immanuel Kant proposed the intuition of  
374 space and time as *a priori* knowledge in the mind for us to understand the physical  
375 world (Kant, 1781), but only until recently have researchers investigated how the  
376 intuition is implemented in the brain as intuitive physics (Kubricht et al., 2017;  
377 McCloskey, 1983). In the Noisy Newtonian Framework, intuitive physics is depicted  
378 as a combination of Newtonian physics and uncertainty generated by noise (Battaglia  
379 et al., 2013; Kubricht et al., 2017; Sanborn et al., 2013). The introduction of  
380 uncertainty helps to reconcile the misconception occurring under unfavorable  
381 conditions, such as unfamiliar events or static scenes (Kaiser et al., 1986, 1992; Kim  
382 & Spelke, 1999; McCloskey, 1983; Smith & Vul, 2013), which was once thought to  
383 support Aristotelian physics (DiSessa, 1982; Halloun & Hestenes, 1985). The noise in  
384 previous studies was thought to originate from sources such as perceptual uncertainty  
385 or external perturbations of forces, rather than from the intuitive physical engine  
386 itself, which is thought to be a deterministic system. Our study extends these  
387 deterministic models by showing a stochastic world model that the noise instead came  
388 from the representation of gravity's direction under Gaussian distribution. The  
389 inherent stochastic feature of gravity's direction did not need to rely on external noise  
390 to explain the illusory instability of taller objects. In addition, it was also confirmed  
391 by the cognitive impenetrability of the Gaussian distribution of gravity's direction  
392 when gravity's direction in the physical world was reversed (Pylyshyn, 1980).

393           With a reinforcement learning framework, we further demonstrated a possible  
394 origin of the stochastic feature of the world model through interactions with the  
395 physical world. In contrast to summarizing statistical patterns from the experience  
396 (Bear et al., 2021; Li et al., 2016; Zhang et al., 2016), this framework was designed to  
397 simulate how an agent constructed the world model on gravity through agent-  
398 environment interactions. Specifically, a world model with undifferentiated directions  
399 of gravity generated a prediction on the stability of an object, and the mismatches  
400 between the prediction and the observation of the object from the physical world were  
401 used to fine-tune the distribution of the directions in the world model. This process is  
402 similar to how humans update their internal knowledge by comparing simulated  
403 expectations (Hegarty, 2004; Ullman et al., 2017) with actual observations  
404 (Baillargeon, 1994, 2004; Kotovsky & Baillargeon, 2000). After several generations  
405 of error minimization, a Gaussian distribution of gravity's direction with the vertically  
406 downward direction as the maximum likelihood was similar to that observed in the  
407 human world model. Interestingly, when the physical worlds that the agent interacted  
408 with changed their appearance with stacks of different heights, the world models  
409 maintained their general patterns, but the stochastic representation of gravity's  
410 direction changed accordingly. This finding not only demonstrates the robustness of  
411 the active inference (Hegarty, 2004; Ullman et al., 2017), which efficiently encodes  
412 critical features under different physical worlds, but also resonates with the idea that  
413 intelligence develops under the constraints of the physical world. Taken together, the  
414 finding from the RL framework implies that the world model on gravity in humans  
415 may also be constructed in the same way, possibly through the mechanism of the  
416 predictive coding in a generative process (Friston, 2018; Huang & Rao, 2011).

417           Our world model on gravity provides an example of the world model theory  
418 that emphasizes the predictive nature of generative neural networks implemented with  
419 *a priori* knowledge of the physical world (Friston et al., 2021; Land, 2014; Matsuo et  
420 al., 2022). In contrast to traditional discriminative neural networks that learn statistical  
421 patterns for stability from gigantic amounts of labeled stacks, generative models  
422 equipped with the physics laws governing the physical world rely much less on  
423 experience. Importantly, the stochastic feature of the model further enhances the  
424 efficiency by balancing accuracy and speed, which improves our chances of better  
425 survival (Cosmides & Tooby, 1997) and adaptation to novel environments (e.g.,  
426 astronauts in outer space (Wang et al., 2022)). Indeed, the close link between human



427 cognition and the physical world through interaction may shed light on the  
428 development of a new generation of AI with human-like intelligence that can work  
429 flexibly in open-ended environments (Marcus, 2018, 2020).

430

431

432

433

434

## 435 **Methods**

### 436 **Creating stacks with different configurations**

437 We designed a block-stacking procedure in a physical simulation platform (PyBullet)  
438 to generate stacks with different configurations. All stacks used in this study were  
439 generated using this procedure with the same parameters listed below.

440 The block-stacking procedure includes three steps (Extended Data Fig. 1a): (1)  
441 defining the designated area, (2) stacking blocks, and (3) fine-tuning block positions.  
442 The first step is to designate a restricted place area. All blocks of a stack were  
443 required to place within the designated area. The designated area controls the  
444 aggregation level of blocks, with a small area clustering blocks closer than a large  
445 area. The designated area is determined by two horizontal parameters  $x$  and  $y$ , which  
446 separately represent the size of the area in two horizontal directions. Therefore, when  
447 the block number is fixed, a smaller area in general constructs a higher stack. After  
448 designating the area, in step two we stacked blocks in random horizontal positions  
449 within the area one by one. If no block was positioned under a new block, the new  
450 block would be directly placed on the ground; otherwise, it would stack on the  
451 positioned block. The horizontal position of each block was independently sampled  
452 from a uniform distribution, with lower and upper bounds being  $-x$  and  $+x$ , or  $-y$  and  
453  $+y$  separately ( $x$  and  $y$  were all independently sampled from a uniform distribution  
454  $U(0.2, 2.0)$ ). The first two steps allow us to generate a large number of configurations  
455 within the designated area, which is the only restriction of the block-stacking  
456 procedure. To better control the physical stability of each stack, in step three we fine-  
457 tuned blocks in the stack by adjusting overlaps between every neighboring one, which  
458 was randomly sampled from a uniform distribution  $U(0.2, 0.8)$ . Smaller overlap  
459 between neighboring blocks is more likely to construct unstable stacks, whereas more  
460 extensive overlap results in more stable stacks. The overlap of neighboring blocks  
461 without contact is set to 0. Note that the overlap between neighboring blocks is not the  
462 only factor determining a stack's stability, and step three is used to generate stacks  
463 without consuming too many computational resources.

464 The size of each block has a 3D aspect ratio of 3:1:1 (length: width: height),  
465 with an arbitrary unit of 1.2:0.4:0.4. This constitutes three types of blocks (length,  
466 width, or height is 1.2, respectively, see Extended Data Fig. 1b). Each block of a stack  
467 was randomly selected as one of the three types of blocks. The mass of each block is

468 set to 0.2 kg, and the friction coefficients and the coefficients of restitution between  
469 blocks are set to 1 and 0, respectively.

470

### 471 **Estimating the stability of a stack**

472 The stability of a stack was obtained by a rigid-body forward simulation under the  
473 natural gravity environment (i.e., natural gravity simulator, NGS). The direction of the  
474 natural gravity points downward (i.e.,  $\vec{G} = (0, 0, -9.8)$ ), and all blocks of a stack are  
475 affected by the same gravity. Gravity is the only factor for changing the state of each  
476 block, and no external force is added during the simulation. Within each simulation,  
477 we recorded 500 simulation stages. In each stage, the center position of each block  
478 was collected to measure the stability of the stack. If the position of any block does  
479 not change during the simulation, the stack is considered stable, otherwise unstable.  
480 We formulate the stack's state according to the below criteria:

$$\begin{aligned} \text{Stable: } & \forall t \wedge \forall m, |P_{tm} - P_{0m}| < \varepsilon \\ \text{Unstable: } & \exists t \vee \exists m, |P_{tm} - P_{0m}| > \varepsilon \end{aligned} \quad (1)$$

481 Where  $t$  is a simulation stage,  $m$  is the block number of a stack,  $P_{tm}$  is the position of  
482 the block  $m$  at stage  $t$ , and  $\varepsilon$  is the just noticeable difference (i.e., j.n.d) of the  
483 perception, which is set to 0.01.

484 The stability of a stack is further calculated by measuring the proportion of  
485 displaced blocks, which is formulated as the following,

$$\text{Stability} = \frac{\sum_{m=1}^M \mathbb{I}(|P_{Tm} - P_{0m}| < \varepsilon)}{M} \quad (2)$$

486 Where  $M$  is the total number of blocks of a stack, and  $T$  is the final stage of the  
487 simulation (i.e.,  $T = 500$ ).  $\mathbb{I}(\cdot) = 1$  when  $|P_{Tb} - P_{0b}| < \varepsilon$ , which denotes that the  
488 stack is stable.

489

### 490 **Measuring participants' sensitivity to gravity's direction**

491 We decomposed gravity's direction into three independent components (Fig. 1b).

$$\begin{aligned} G_x &= g \sin \theta \cos \varphi \\ G_y &= g \sin \theta \sin \varphi \\ G_z &= g \cos \theta \end{aligned} \quad (3)$$

492 Where  $g$  is the magnitude of gravity ( $g = 9.8$ ), which was fixed in this study.  $\theta$   
493 represents the vertical component,  $\varphi$  represents the horizontal component, and  $x, y,$

494 and  $z$  are three mutually perpendicular axes. The direction of the gravity was  
495 determined by the angle pair  $(\theta, \varphi)$ , where  $\theta$  affects the extent of the collapse, and  $\varphi$   
496 affects the orientation of the collapse. When  $\theta$  is 0, gravity's direction is vertical.

497 We performed a psychophysics experiment to measure humans' sensitivity to  
498 gravity's direction. In this experiment, 10 participants (5 female, age range: 21-28)  
499 from Tsinghua University were recruited to finish four runs of the behavioral  
500 experiment, which measured their ability to detect the abnormality of stacks' collapse  
501 trajectories. The experiment was approved by the Institutional Review Board of  
502 Tsinghua University, and informed consent was obtained from all participants before  
503 the experiment.

504 The collapse trajectory of a stack was solely determined by gravity with  
505 different directions, where larger values of  $\theta$  and  $\varphi$  made the trajectories more  
506 abnormal. A pilot experiment showed that almost all  $\theta_s$  greater than 45 degrees made  
507 the collapse trajectory abnormal to most participants, and therefore in the experiment,  
508  $\theta$  ranges from 0 to 45 degrees with a step of 3 degrees.  $\varphi$  ranges from 0 to 360  
509 degrees with a step of 24 degrees. Therefore,  $\theta$  and  $\varphi$  consists of 16 values,  
510 respectively, which were randomly combined into 96 pairs of  $(\theta, \varphi)$  with each value  
511 repeating 6 times in each run. In a trial, an unstable stack was constructed, and then  
512 the camera rotated one circle to show the 3D configuration of the stack to participants  
513 (Supplementary Movie S1). The configuration was randomly selected from a dataset  
514 with more than 2,000 unstable stacks, which was generated with the block-stacking  
515 procedure before the experiment. Each stack in the database was constructed with 10  
516 blocks, and the color of each block was randomly rendered. There was a 1-sec delay  
517 after the rotation, during which the participants were instructed to infer the collapse  
518 trajectory based on the configuration. Then, simulated gravity with a direction  
519 determined by an angle pair  $(\theta, \varphi)$  was applied to the stack, and the stack started to  
520 collapse. If the collapse trajectory met participants' expectations, they were instructed  
521 to choose 'Normal,' otherwise 'Abnormal'. Once the judgment was made, the  
522 subsequent trial started immediately. Each trial lasts about 10 seconds, taking 16  
523 minutes for a run.

524 In addition, to test if participants' sensitivity to gravity's direction is  
525 encapsulated from visual experience and task context, we flipped gravity's direction

526 upside down by inverting the camera's view, and the rest procedure remained the  
527 same.

528 To calculate participants' sensitivity to gravity's direction, we converted their  
529 behavioral judgment into normality ratio, which is the percentage that a trajectory was  
530 judged as normal, which was calculated as below:

$$Ratio_{\theta,\varphi} = \frac{n_{\theta,\varphi}}{N_{\theta,\varphi}} \quad (4)$$

531 Where  $n_{\theta,\varphi}$  is the number of trajectories that were judged as 'Normal' with the angle  
532 pair  $(\theta, \varphi)$ ,  $N_{\theta,\varphi}$  is the total number of trajectories with the same angle pair. Because  
533 the angle pairs tested were a subset of all possible angle pairs, we used the average  
534 ratio along  $\varphi$  as the ratio of angle pairs untested (Fig. 1c) to acquire each participant's  
535 tuning curve. Finally, we calculated participants' sensitivity by fitting their normality  
536 ratios at different  $\theta$  to a Gaussian distribution.

$$Ratio_{\theta} = Ae^{-\frac{\theta^2}{2\sigma^2}} \quad (5)$$

537 Where  $Ratio_{\theta}$  is the normality ratio of  $\theta$ , which was calculated by averaging the  
538 normality ratio along all  $\varphi_s$ ,  $A$  is the magnitude of the gaussian curve,  $\sigma$  is the  
539 variance of the Gaussian curve. The best-fitted  $\sigma$  was used to index participants'  
540 sensitivity to gravity's direction, and a larger  $\sigma$  indicates a lower sensitivity.

541

### 542 **Measuring participants' ability on stability inference**

543 Another group of 11 participants (5 female, age range: 21-32) from Tsinghua  
544 University completed a behavioral experiment for judging the stability of 60 stacks.  
545 The experiment was approved by the Institutional Review Board of Tsinghua  
546 University, and informed consent was obtained from all participants before the  
547 experiment. One male participant (age: 25) was excluded from further analyses  
548 because his judgment showed an extremely weak correlation with the actual stability  
549 of stacks ( $r_s < 0.30$  for all experimental runs), as compared to the rest of the  
550 participants.

551 The stacks contained 26 unstable and 34 stable stacks, which were randomly  
552 interleaved in each run. The participants were instructed to judge stacks' stability on  
553 an 8-point Likert scale, with 0 referring to 'definitely unstable' and 7 to 'definitely  
554 stable.' There was no feedback after each judgment. The participants completed six  
555 runs, within which the same group of stacks was presented but the sequence, blocks'

556 colors, and camera's perspective were all randomized. After the experiment, only two  
557 participants reported that they suspected a few stacks were repeated in different runs,  
558 but they could not locate the stacks they suspected. Besides, their behavioral  
559 performance was not significantly different from other participants.

560 Participants' stability judgment was rescaled to 0 and 1 to match the scale of  
561 the stacks' stability. The participants' inference bias (IB) was indexed as the  
562 difference in stability judgment between the participants and the NGS, shown as

$$IB = Stability_{human} - Stability_{NGS} \quad (6)$$

563 Negative IB indicates that participants tended to consider a stable stack as an unstable  
564 one.

565

## 566 **Estimating the stability of stacks based on the stochastic world model** 567 **on gravity**

568 The actual stability of a stack can be calculated with a one-time simulation of NGS ( $\vec{G}$   
569 = (0, 0, -9.8)). In contrast, the stochastic nature of mental gravity requires a multiple-  
570 time simulation with different gravity's directions. Specifically, we first randomly  
571 sampled several angle pairs ( $\theta_s, \varphi_s$ ) from the Gaussian distribution of gravity's  
572 directions in humans. The distribution was the average of two distributions acquired  
573 from the real world (i.e., gravity's direction is downward) and the inverted world (the  
574 direction is upward), with angles having larger normality ratios more likely being  
575 sampled. We then applied the simulated gravity with these sampled directions to the  
576 stack, and used the averaged stability with these directions as the stability of the stack  
577 estimated by the MGS. Similar to the IB between the participants and the NGS, the IB  
578 between the MGS and NGS was calculated as

$$IB = Stability_{MGS} - Stability_{NGS} \quad (7)$$

579 Stacks of different heights were created to investigate whether the stochastic  
580 world model on gravity results in the illusion that tall objects are considered less  
581 stable than short ones. The height of a stack was correlated with the size of the  
582 designated area, with a smaller area size corresponding to taller stacks. Therefore, we  
583 designated several square areas with different sizes. The side length of the squares  
584 ranged from 0.2 to 2.0, with an increase of 0.1. For each square, we used the block-  
585 stacking procedure to generate 100 stable and 100 unstable stacks consisting of 10  
586 blocks. The height of each stack was the height of the highest block.

587

## 588 **Investigating the origin of the stochastic world model on gravity**

589 A reinforcement learning (RL) framework was used to simulate the development of  
590 the stochastic nature of the world model on gravity. To do this, we first created stacks  
591 whose block number ranged from 2 to 15 with the block-stacking procedure, and  
592 initialized a spherical force space, where  $\theta$  ranged from 0 to 180 degrees and  $\varphi$  from  
593 0 to 360 degrees. The spherical space covered all possible force directions, with the  
594 initial probability of being sampled by the MGS identical. During the training, three  
595 angle pairs  $(\theta_s, \varphi_s)$  were sampled according to the probability of the spherical space,  
596 and then applied to a stack for simulating its collapse trajectory, which was divided  
597 into 500 stages. We optimized the sampling probability of gravity's direction by  
598 comparing the estimated stability (i.e., expectation) with the actual stability (i.e.,  
599 observation) as a Q value, with a higher Q value suggesting that the sampled gravity's  
600 direction more likely mismatched the actual gravity's direction. The Q value was  
601 calculated as

$$Q = \frac{\sum_{m=1}^M \mathbb{I}(|P_{m,(\theta,\varphi)} - P_m| < \varepsilon)}{M} \quad (8)$$

602 Where  $P_{m,(\theta,\varphi)}$  is the final position of block m with gravity's direction  $(\theta, \varphi)$ ,  $P_m$  is  
603 the final position of block m with NGS, M is the block number of the stack, and the  
604 j.n.d.  $\varepsilon$  is set to 0.01. The mismatch between the expectation and the observation was  
605 used to update the sampling probability of the angle pair using a temporal difference  
606 optimization

$$W_{\theta,\varphi} \leftarrow W_{\theta,\varphi} + \gamma(Q - W_{\theta,\varphi}) \quad (9)$$

607 Where  $\gamma = 0.15$  as the learning rate. This process was iterated to update the sample  
608 probability of angle pairs  $(\theta_s, \varphi_s)$  until the training stopped. We prepared 100,000  
609 configurations for the training.

610

## 611 **Evaluating the ecological advantage of the model**

612 To investigate how the world model on gravity balances response accuracy and speed,  
613 we trained a linear classifier (i.e., logistic regression) to model humans' decision-  
614 making process at different simulation stages. During the simulation, the same stack  
615 was separately simulated using the NGS and MGS, and we collected the position  
616 coordinates of all blocks at each stage. Differences in the positions of the blocks

617 between the intermediate stage and the initial stage provided information about the  
618 stability of a stack, with more displaced blocks suggesting the lower stack's stability.  
619 As the simulation proceeded, differences in position gradually accumulated for  
620 unstable stacks, otherwise unchanged for stable stacks. The linear classifier was  
621 trained to judge whether a stack is stable with differences in position as inputs.

622 We used the block-stacking procedure to create stacks consisting of 2 to 10  
623 blocks, and estimated their stabilities with the NGS for simulation in 500 stages. For  
624 each block number, there were 100 stable and 100 unstable stacks to train the linear  
625 classifier, and its prediction accuracy was measured with another group of 100 stable  
626 and 100 unstable stacks at every simulation stage.

627 The difference in positions of each block between the intermediate and initial  
628 stages was used as the input of the linear classifier. Specifically, we collected all  
629 vertex positions of a block during the simulation to acquire the difference in position,  
630 which included 8 coordinate points for each block in each stage. We did not collect  
631 the central position as previously used in the stability estimation, simply because it  
632 did not provide information on the shape and size of the block. We separately  
633 performed the simulation using the MGS and NGS, calculated the difference in  
634 position between the intermediate stage and the initial stage, and then flattened the  
635 difference to generate 24 position features for each block (i.e., eight positions per  
636 block in three-dimensional space). Therefore, for a 10-block stack as an example,  
637 there were 240 position features were prepared as the input of the linear classifier.

638 Prediction accuracy at each stage was estimated by evaluating whether a stack  
639 tested was stable with the MGS or with the NGS. The highest accuracy in the whole  
640 simulation stages was used as the prediction accuracy. Accordingly, the first  
641 simulation stage to reach the maximum accuracy provided information on response  
642 speed: reaching the maximum accuracy with a smaller number of stages indicates the  
643 classifier model accomplishes stability inference in a shorter amount of time (i.e.,  
644 quick response). Therefore, we measured the response speed by estimating the steps  
645 to reach the accuracy plateau.

$$Time = \frac{\hat{t}}{T} \quad (10)$$
$$\hat{t} = \arg \max_t Accuracy_t$$

646 Where  $Accuracy_t$  is the accuracy of stage  $t$ .  $\hat{t}$  is the stage that a linear classifier  
647 acquires the maximum accuracy for the first time,  $T$  is the total stage number of each



648 simulation ( $T = 500$ ). Higher values indicate longer response time (i.e., slower  
649 response). Finally, the efficiency of the stability inference, which is the balance  
650 between accuracy and speed, by dividing the prediction accuracy by the response  
651 time.

$$Efficiency = \frac{Accuracy}{Time} \quad (11)$$

652  
653  
654  
655  
656  
657  
658  
659  
660  
661  
662  
663

## 664 **References**

- 665 Allen, K. R., Smith, K. A., & Tenenbaum, J. B. (2020). Rapid trial-and-error learning  
666 with simulation supports flexible tool use and physical reasoning. *Proceedings of the*  
667 *National Academy of Sciences*, *117*(47), 29302–29310.
- 668 Baillargeon, R. (1994). How do infants learn about the physical world? *Current*  
669 *Directions in Psychological Science*, *3*(5), 133–140.
- 670 Baillargeon, R. (2004). Infants' physical world. *Current Directions in Psychological*  
671 *Science*, *13*(3), 89–94.
- 672 Battaglia, P. W., Hamrick, J. B., & Tenenbaum, J. B. (2013). Simulation as an engine  
673 of physical scene understanding. *Proceedings of the National Academy of Sciences*,  
674 *110*(45), 18327–18332.
- 675 Bear, D. M., Wang, E., Mrowca, D., Binder, F. J., Tung, H.-Y. F., Pramod, R.,  
676 Holdaway, C., Tao, S., Smith, K., Sun, F.-Y., & others. (2021). Physion: Evaluating  
677 physical prediction from vision in humans and machines. *ArXiv Preprint*  
678 *ArXiv:2106.08261*.
- 679 Blatner, D. (2013). *Spectrums: Our mind-boggling universe from infinitesimal to*  
680 *infinity*. A&C Black.
- 681 Cosmides, L., & Tooby, J. (1997). *Evolutionary psychology: A primer*.
- 682 Coumans, E., & Bai, Y. (2016). *Pybullet, a python module for physics simulation for*  
683 *games, robotics and machine learning*. <https://pybullet.org>
- 684 DiSessa, A. A. (1982). Unlearning Aristotelian physics: A study of knowledge-based  
685 learning. *Cognitive Science*, *6*(1), 37–75.
- 686 Fischer, J., Mikhael, J. G., Tenenbaum, J. B., & Kanwisher, N. (2016). Functional  
687 neuroanatomy of intuitive physical inference. *Proceedings of the National Academy*  
688 *of Sciences*, *113*(34), E5072–E5081.
- 689 Friedman, W. J. (2002). Arrows of time in Infancy: The representation of temporal–  
690 causal invariances. *Cognitive Psychology*, *44*(3), 252–296.
- 691 Friston, K. (2018). Does predictive coding have a future? *Nature Neuroscience*, *21*(8),  
692 1019–1021.
- 693 Friston, K., Moran, R. J., Nagai, Y., Taniguchi, T., Gomi, H., & Tenenbaum, J.  
694 (2021). World model learning and inference. *Neural Networks*, *144*, 573–590.
- 695 Halloun, I. A., & Hestenes, D. (1985). Common sense concepts about motion.  
696 *American Journal of Physics*, *53*(11), 1056–1065.
- 697 Hegarty, M. (2004). Mechanical reasoning by mental simulation. *Trends in Cognitive*  
698 *Sciences*, *8*(6), 280–285.
- 699 Huang, Y., & Rao, R. P. (2011). Predictive coding. *Wiley Interdisciplinary Reviews:*  
700 *Cognitive Science*, *2*(5), 580–593.
- 701 Indovina, I., Maffei, V., Bosco, G., Zago, M., Macaluso, E., & Lacquaniti, F. (2005).  
702 Representation of visual gravitational motion in the human vestibular cortex. *Science*,  
703 *308*(5720), 416–419.
- 704 Kaiser, M. K., Jonides, J., & Alexander, J. (1986). Intuitive reasoning about abstract  
705 and familiar physics problems. *Memory & Cognition*, *14*(4), 308–312.
- 706 Kaiser, M. K., Proffitt, D. R., Whelan, S. M., & Hecht, H. (1992). Influence of  
707 animation on dynamical judgments. *Journal of Experimental Psychology: Human*  
708 *Perception and Performance*, *18*(3), 669.
- 709 Kant, I. (1781). *The Critique of Pure Reason*.
- 710 Kim, I.-K., & Spelke, E. S. (1999). Perception and understanding of effects of gravity  
711 and inertia on object motion. *Developmental Science*, *2*(3), 339–362.
- 712 Kotovsky, L., & Baillargeon, R. (2000). Reasoning about collisions involving inert  
713 objects in 7.5-month-old infants. *Developmental Science*, *3*(3), 344–359.

- 714 Kubricht, J. R., Holyoak, K. J., & Lu, H. (2017). Intuitive physics: Current research  
715 and controversies. *Trends in Cognitive Sciences*, 21(10), 749–759.
- 716 Lacquaniti, F., & Maioli, C. (1989). Adaptation to suppression of visual information  
717 during catching. *Journal of Neuroscience*, 9(1), 149–159.
- 718 Lake, B. M., Ullman, T. D., Tenenbaum, J. B., & Gershman, S. J. (2017). Building  
719 machines that learn and think like people. *Behavioral and Brain Sciences*, 40.
- 720 Land, M. F. (2014). Do we have an internal model of the outside world?  
721 *Philosophical Transactions of the Royal Society B: Biological Sciences*, 369(1636),  
722 20130045.
- 723 Li, W., Azimi, S., Leonardis, A., & Fritz, M. (2016). To fall or not to fall: A visual  
724 approach to physical stability prediction. *ArXiv Preprint ArXiv:1604.00066*.
- 725 MacKay, D. M. (1956). The epistemological problem for automata. In *Automata*  
726 *Studies.(AM-34), Volume 34* (pp. 235–252). Princeton University Press.
- 727 Marcus, G. (2018). *Deep Learning: A Critical Appraisal*.
- 728 Marcus, G. (2020). The next decade in ai: Four steps towards robust artificial  
729 intelligence. *ArXiv Preprint ArXiv:2002.06177*.
- 730 Matsuo, Y., LeCun, Y., Sahani, M., Precup, D., Silver, D., Sugiyama, M., Uchibe, E.,  
731 & Morimoto, J. (2022). Deep learning, reinforcement learning, and world models.  
732 *Neural Networks*.
- 733 McCloskey, M. (1983). Intuitive physics. *Scientific American*, 248(4), 122–131.
- 734 McIntyre, J., Zago, M., Berthoz, A., & Lacquaniti, F. (2001). Does the brain model  
735 Newton’s laws? *Nature Neuroscience*, 4(7), 693–694.
- 736 Pramod, R., Cohen, M. A., Tenenbaum, J. B., & Kanwisher, N. (2022). Invariant  
737 representation of physical stability in the human brain. *ELife*, 11, e71736.
- 738 Pylyshyn, Z. W. (1980). Computation and cognition: Issues in the foundations of  
739 cognitive science. *Behavioral and Brain Sciences*, 3(1), 111–132.
- 740 Sanborn, A. N., Mansinghka, V. K., & Griffiths, T. L. (2013). Reconciling intuitive  
741 physics and Newtonian mechanics for colliding objects. *Psychological Review*,  
742 120(2), 411.
- 743 Smith, K. A., & Vul, E. (2013). Sources of uncertainty in intuitive physics. *Topics in*  
744 *Cognitive Science*, 5(1), 185–199.
- 745 Tenenbaum, J. B., Kemp, C., Griffiths, T. L., & Goodman, N. D. (2011). How to  
746 grow a mind: Statistics, structure, and abstraction. *Science*, 331(6022), 1279–1285.
- 747 Ullman, T. D., Spelke, E., Battaglia, P., & Tenenbaum, J. B. (2017). Mind games:  
748 Game engines as an architecture for intuitive physics. *Trends in Cognitive Sciences*,  
749 21(9), 649–665.
- 750 Wang, Y., Zhang, X., Wang, C., Huang, W., Xu, Q., Liu, D., Zhou, W., Chen, S., &  
751 Jiang, Y. (2022). Modulation of biological motion perception in humans by gravity.  
752 *Nature Communications*, 13(1), 1–10.
- 753 Zago, M., & Lacquaniti, F. (2005). Visual perception and interception of falling  
754 objects: A review of evidence for an internal model of gravity. *Journal of Neural*  
755 *Engineering*, 2(3), S198.
- 756 Zago, M., McIntyre, J., Senot, P., & Lacquaniti, F. (2009). Visuo-motor coordination  
757 and internal models for object interception. *Experimental Brain Research*, 192(4),  
758 571–604.
- 759 Zhang, R., Wu, J., Zhang, C., Freeman, W. T., & Tenenbaum, J. B. (2016). A  
760 comparative evaluation of approximate probabilistic simulation and deep neural  
761 networks as accounts of human physical scene understanding. *ArXiv Preprint*  
762 *ArXiv:1605.01138*.

763 Zhou, L., Smith, K., Tenenbaum, J., & Gerstenberg, T. (2022). *Mental Jenga: A*  
764 *counterfactual simulation model of physical support.*

765

766

767

768

769

770 **Acknowledgments**

771 **Funding:** This study was funded by Beijing Municipal Science & Technology  
772 Commission and Administrative Commission of Zhongguancun Science Park  
773 (Z221100002722012), the Shuimu Tsinghua Scholar Program (T.H.), Tsinghua  
774 University Guoqiang Institute (2020GQG1016), Tsinghua University Qiyuan  
775 Laboratory, and Beijing Academy of Artificial Intelligence (BAAI).

776 **Author contributions:** J.L. conceptualized the study. T.H. designed and conducted  
777 the experiments. T.H. analyzed data. T.H. and J.L. wrote the manuscript.

778 **Competing interests:** Authors declare no competing interests.

779 **Data and materials availability:** All code and data underlying our study and  
780 necessary to reproduce the results are available on Github:

781 <https://github.com/helloTC/GravityWorldModel>.

782

783

784 **Extended Data Fig.1**

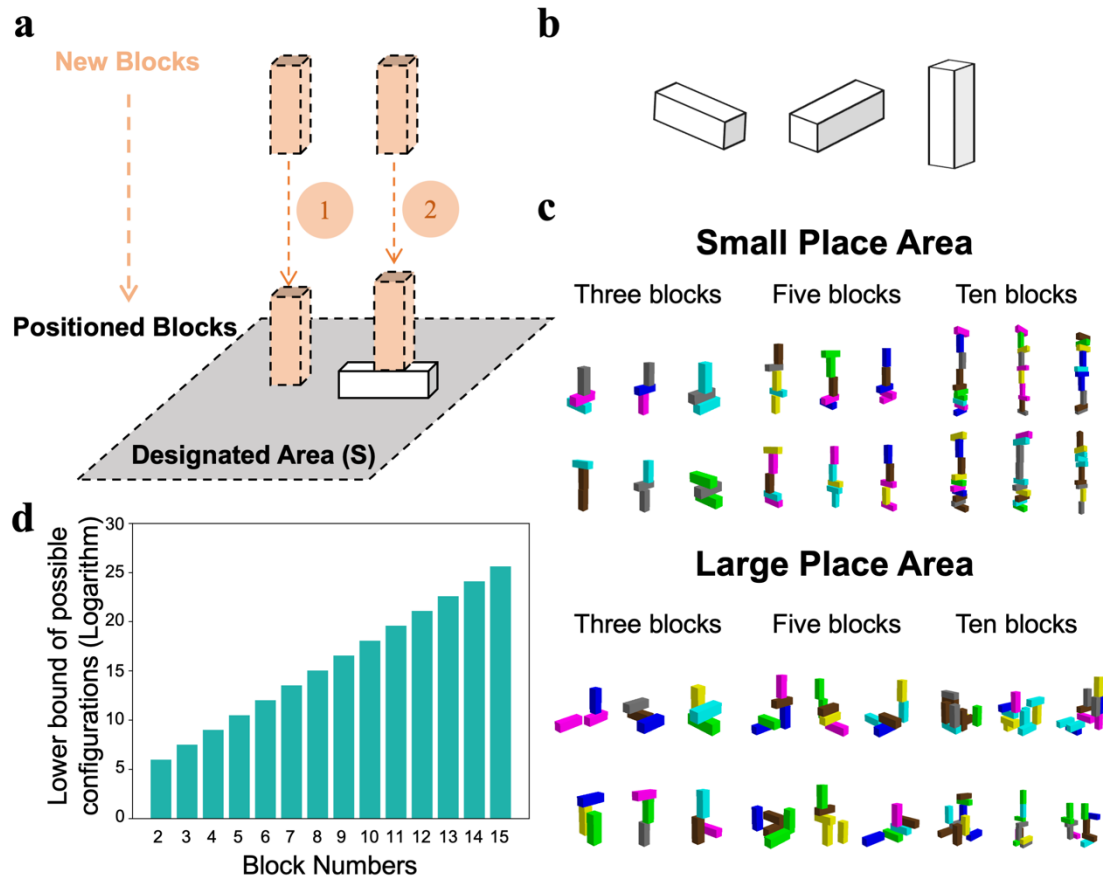

785

786 Extended Data Fig. 1 **Construction of stacks with different configurations.** a) Illustration of the  
787 block-stacking procedure to create stacks in different configurations. A configuration was constructed  
788 by placing multiple blocks within a designated area. If there was no positioned block in the area, a new  
789 block was placed on the ground; otherwise, it was placed on top of the positioned block. b) Three types  
790 of blocks with an aspect ratio of 3:1:1. c) This procedure can create a large number of stacks with  
791 different configurations within designated areas. Note that in small areas, the height of stacks was  
792 taller. d) The lower bound of configurations' possible number showed an exponential relation with the  
793 number of blocks in a stack. The procedure can create at least  $3.72 \times 10^{19}$  configurations for stacks  
794 consisting of 10 blocks. See the appendix for the estimation.

795

796

797

798

799 **Extended Data Fig.2**

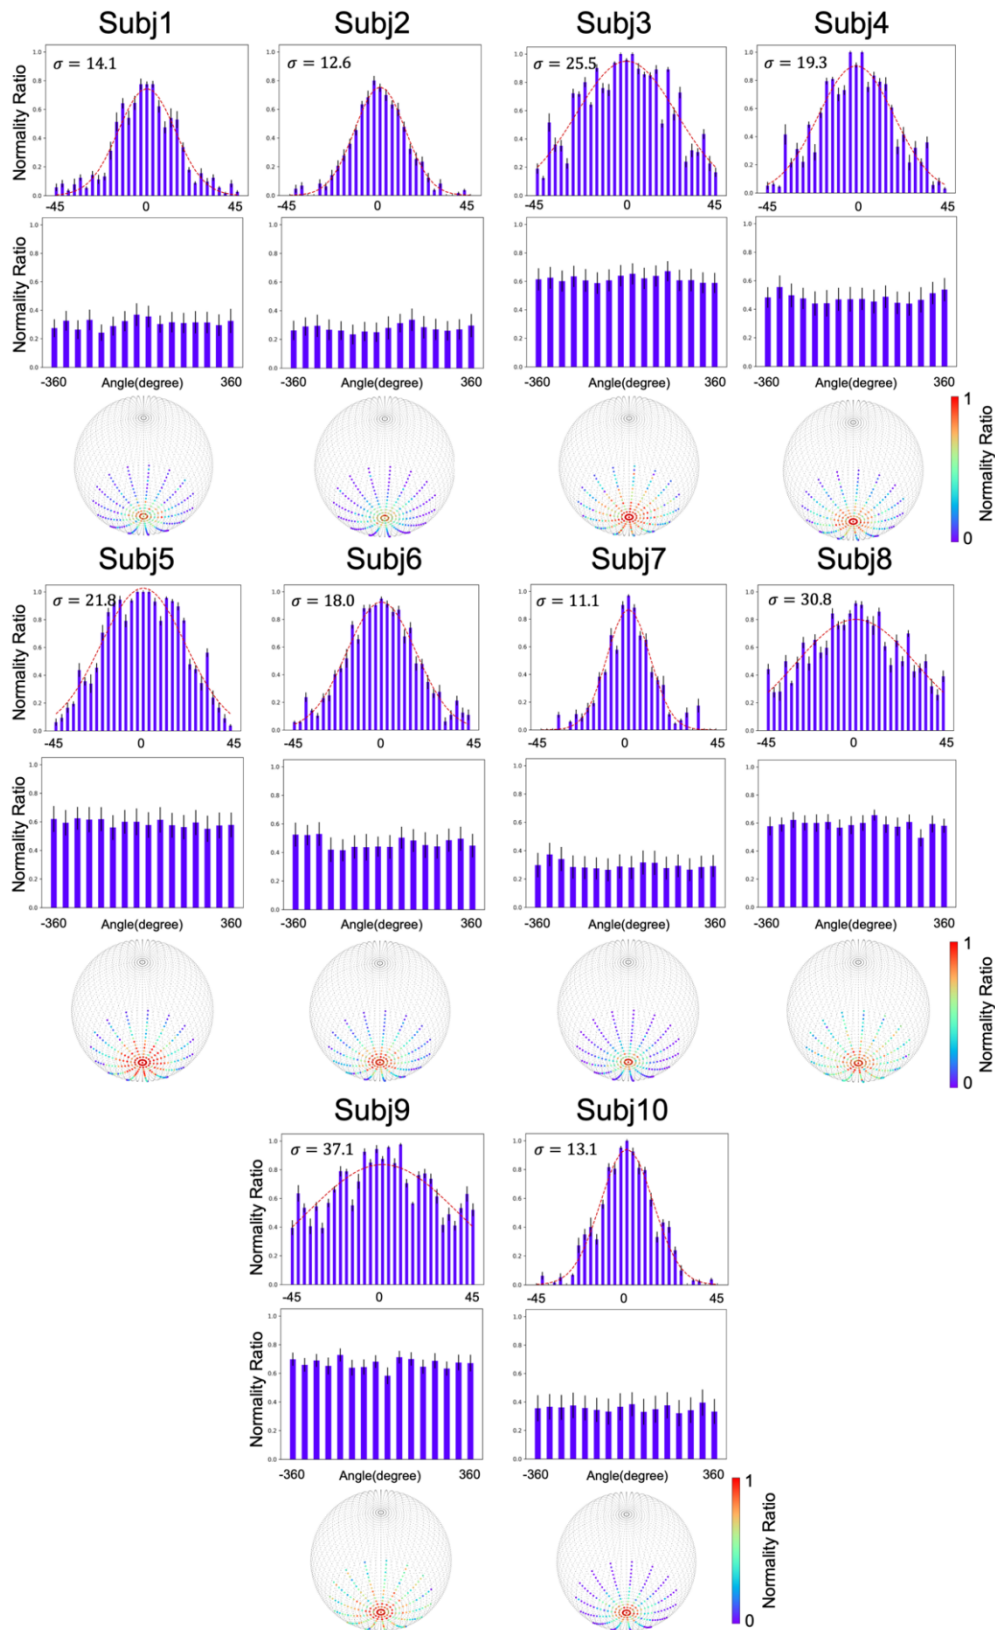

800

801 Extended Data Fig. 2 **The stochastic world model on gravity of each participant.** The normality  
802 ratios of  $\theta$  followed a Gaussian distribution, with the variance ranging from 11.1 to 37.1. No stochastic  
803 characteristic was observed in  $\varphi$ .

804 **Extended Data Fig. 3**

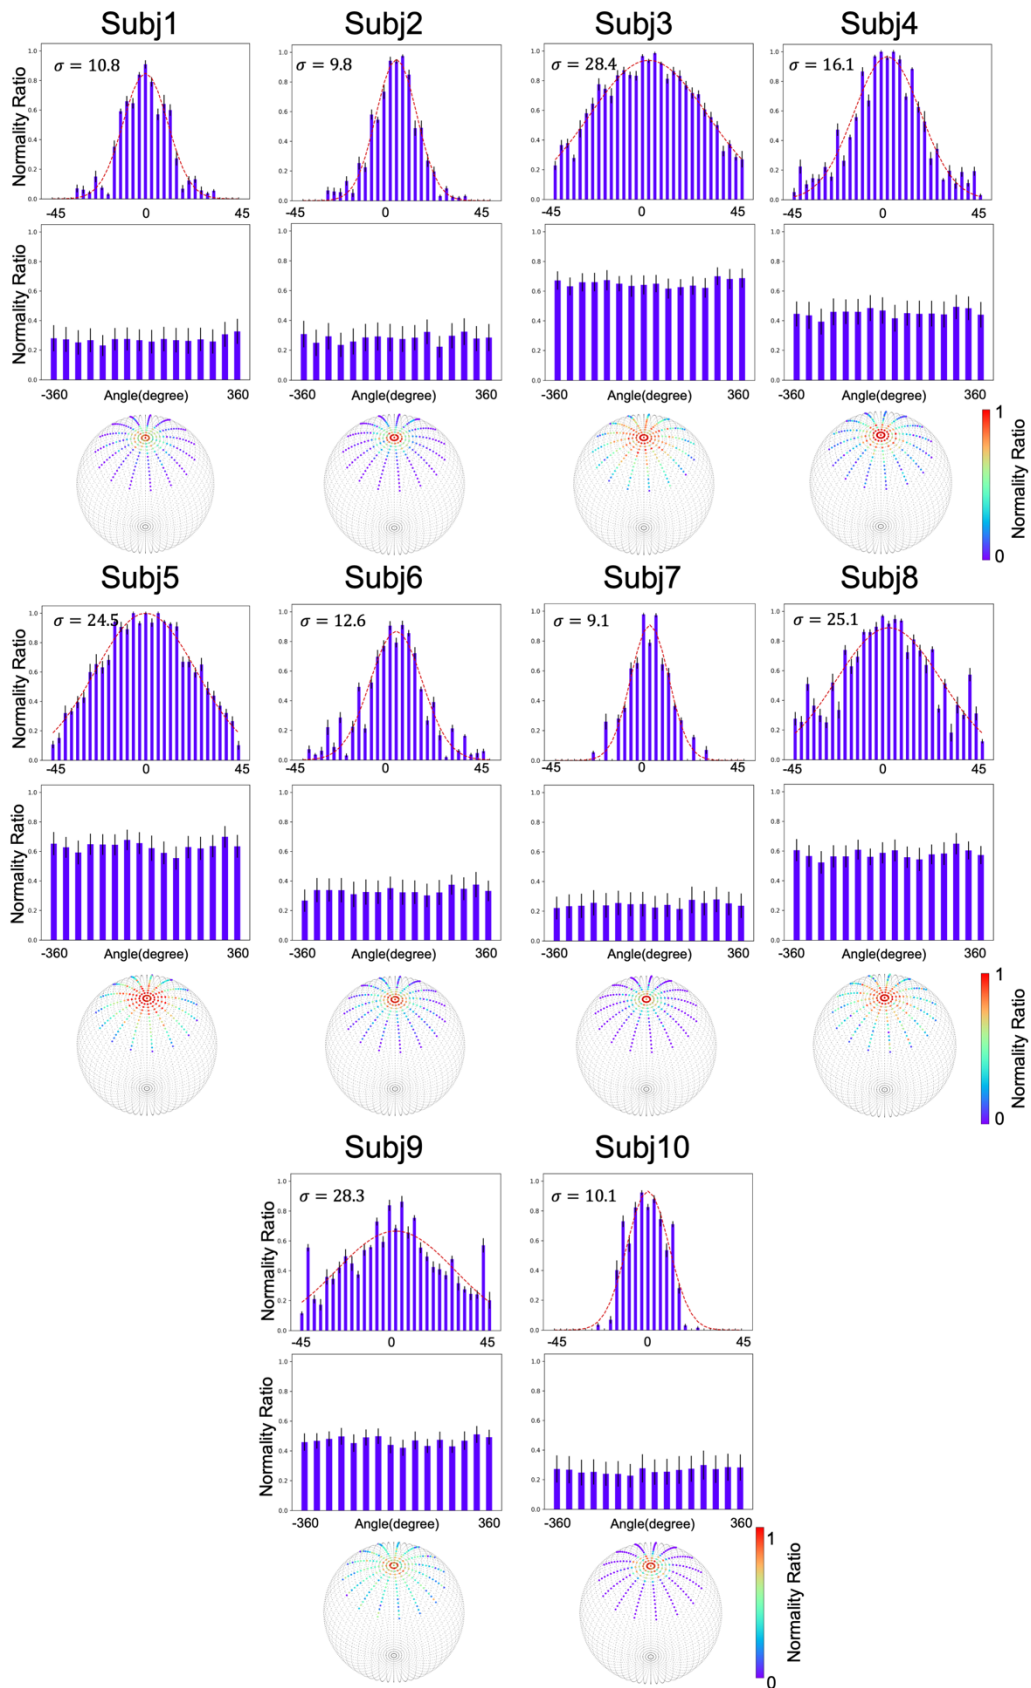



806 Extended Data Fig. 2 **The stochastic world model on gravity of each participant when gravity's**  
807 **direction was inverted.** The normality ratios of  $\theta$  also followed a Gaussian distribution, with the  
808 variance ranging from 9.1 to 28.4, and no stochastic characteristic was observed along  $\varphi$ .  
809  
810

811 **Extended Data Fig. 4**

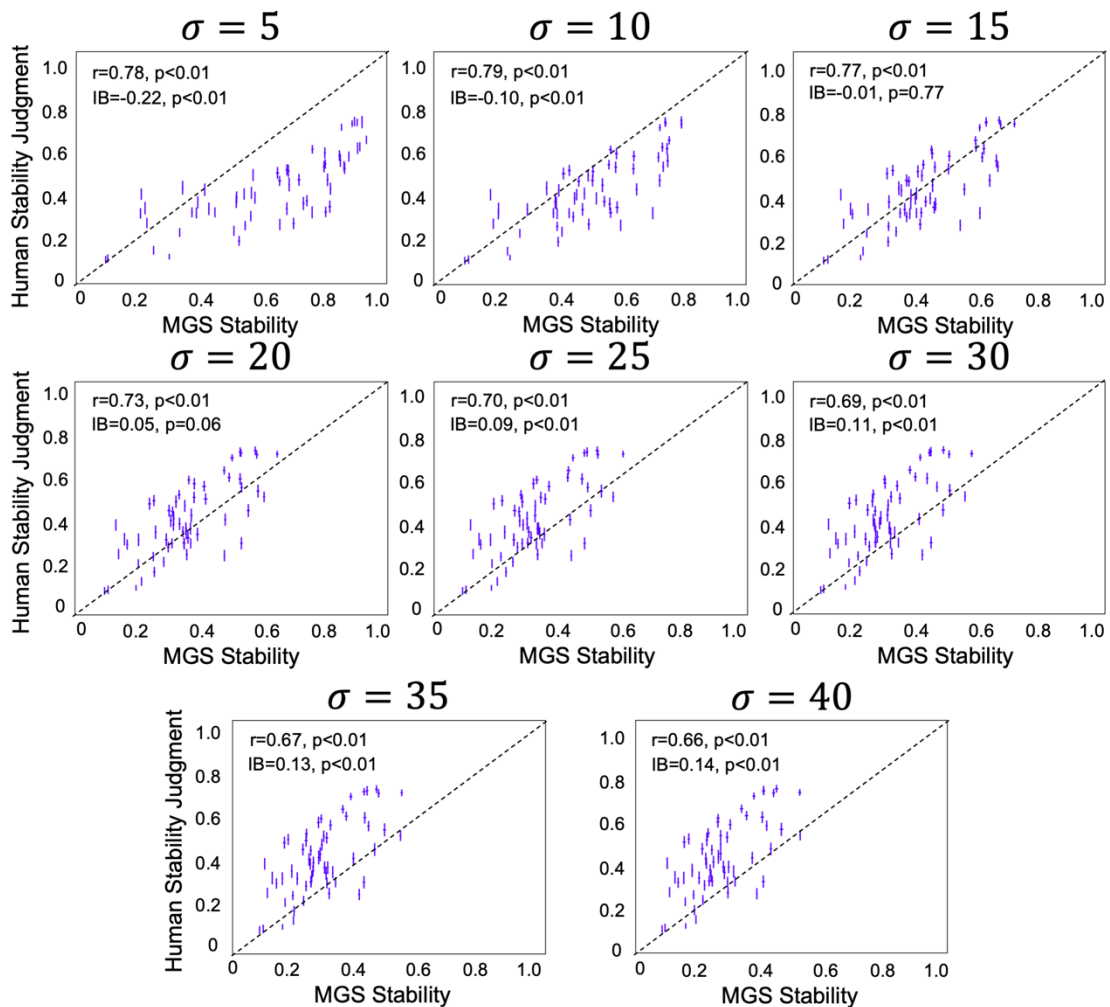

812

813 Extended Data Fig. 4 **Relation between the stability estimated by the MGS stability and that by**  
814 **participants when the world model was implemented with different Gaussian functions.** Only  
815 when the world model embodied Gaussian functions with intermediate variance (i.e.,  $\sigma \in (15,20)$ ) did  
816 the stability estimated by the MGS match participants' stability inference. On the other hand, when the  
817 variance was small, most points were positioned below the diagonal line, indicating the model  
818 considered stacks more stable in general as compared to participants' judgment. When the variance was  
819 large, the model considered stacks less stable. Note that all models showed high correlation coefficients  
820 regardless of the bias. In other words, the magnitude of the correlation is not the sole indicator to  
821 evaluate the fitness of the model. IB: inference bias.

822

823

824 **Extended Data Fig. 5**

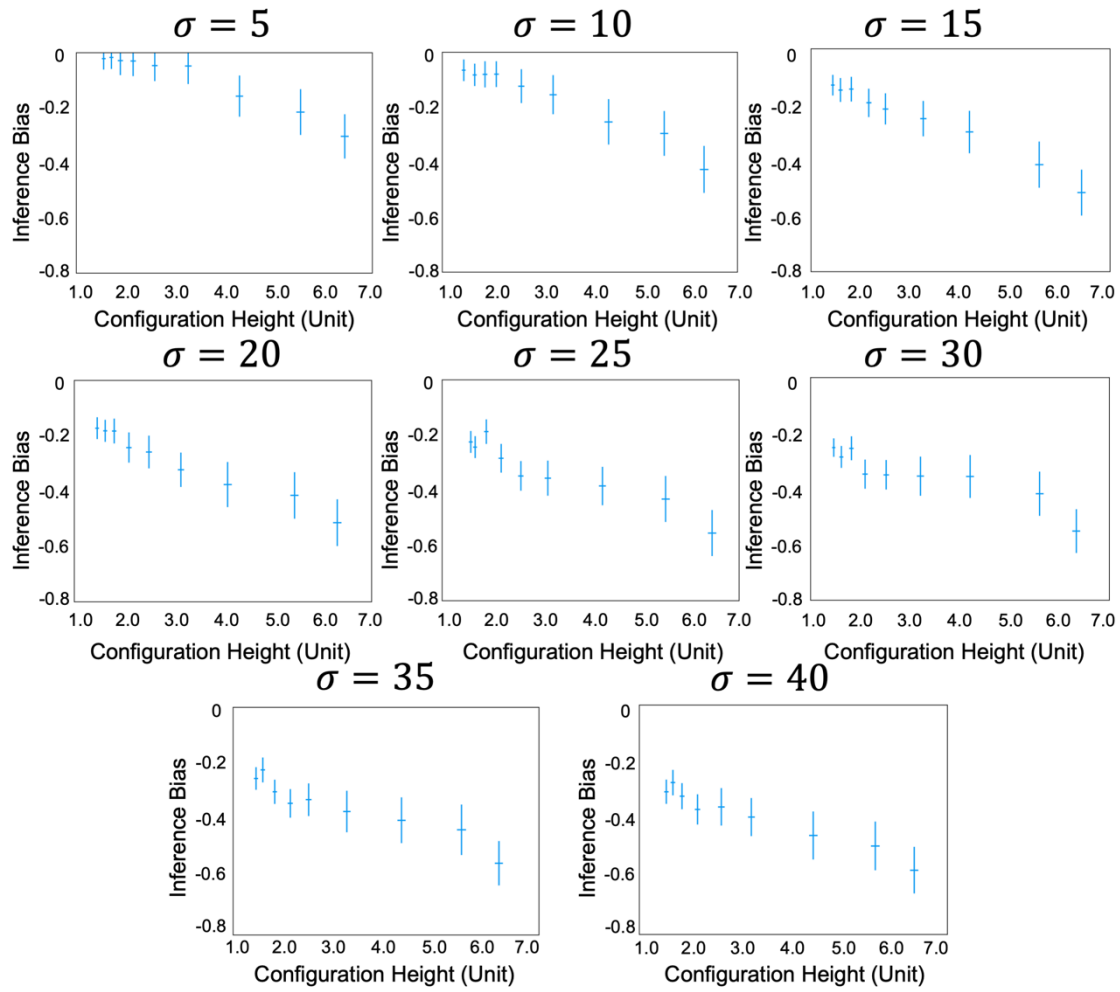

825

826 Extended Data Fig. 5 **Height illusion of stability inference when the world model was implemented**

827 **with different Gaussian functions.** The illusion that tall objects are considered more unstable than

828 short ones manifests at all levels of variances of Gaussian functions, with larger variance leading to a

829 stronger illusion.

830

831 **Extended Data Fig. 6**

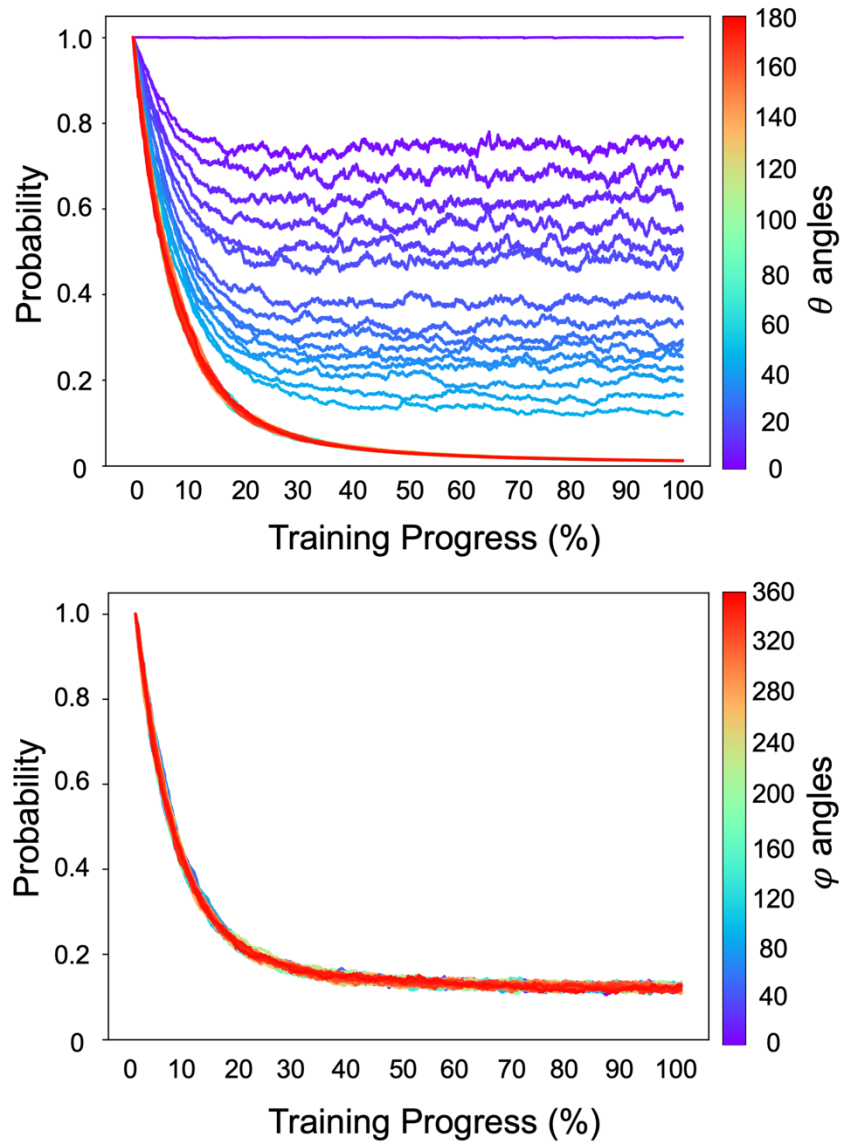

832

833

834 Extended Data Fig. 6 **The developmental trajectory of  $\theta$  (Top) and  $\varphi$  (Bottom) angles.** Sampling  
835 probabilities of  $\theta$  angles gradually decreased during reinforcement learning, with the probabilities from  
836 smaller  $\theta$  angles having a lower decrement tendency. The probability of  $\theta$  without any deviation (i.e.,  
837  $\theta = 0$ ) keeps unchanged. Probabilities of all  $\theta$  angles finally reached convergence after about 50%  
838 training progress. Different from  $\theta$  angles, sampling probabilities of the  $\varphi$  angles dropped evenly.

839

840

841 **Extended Data Fig. 7**

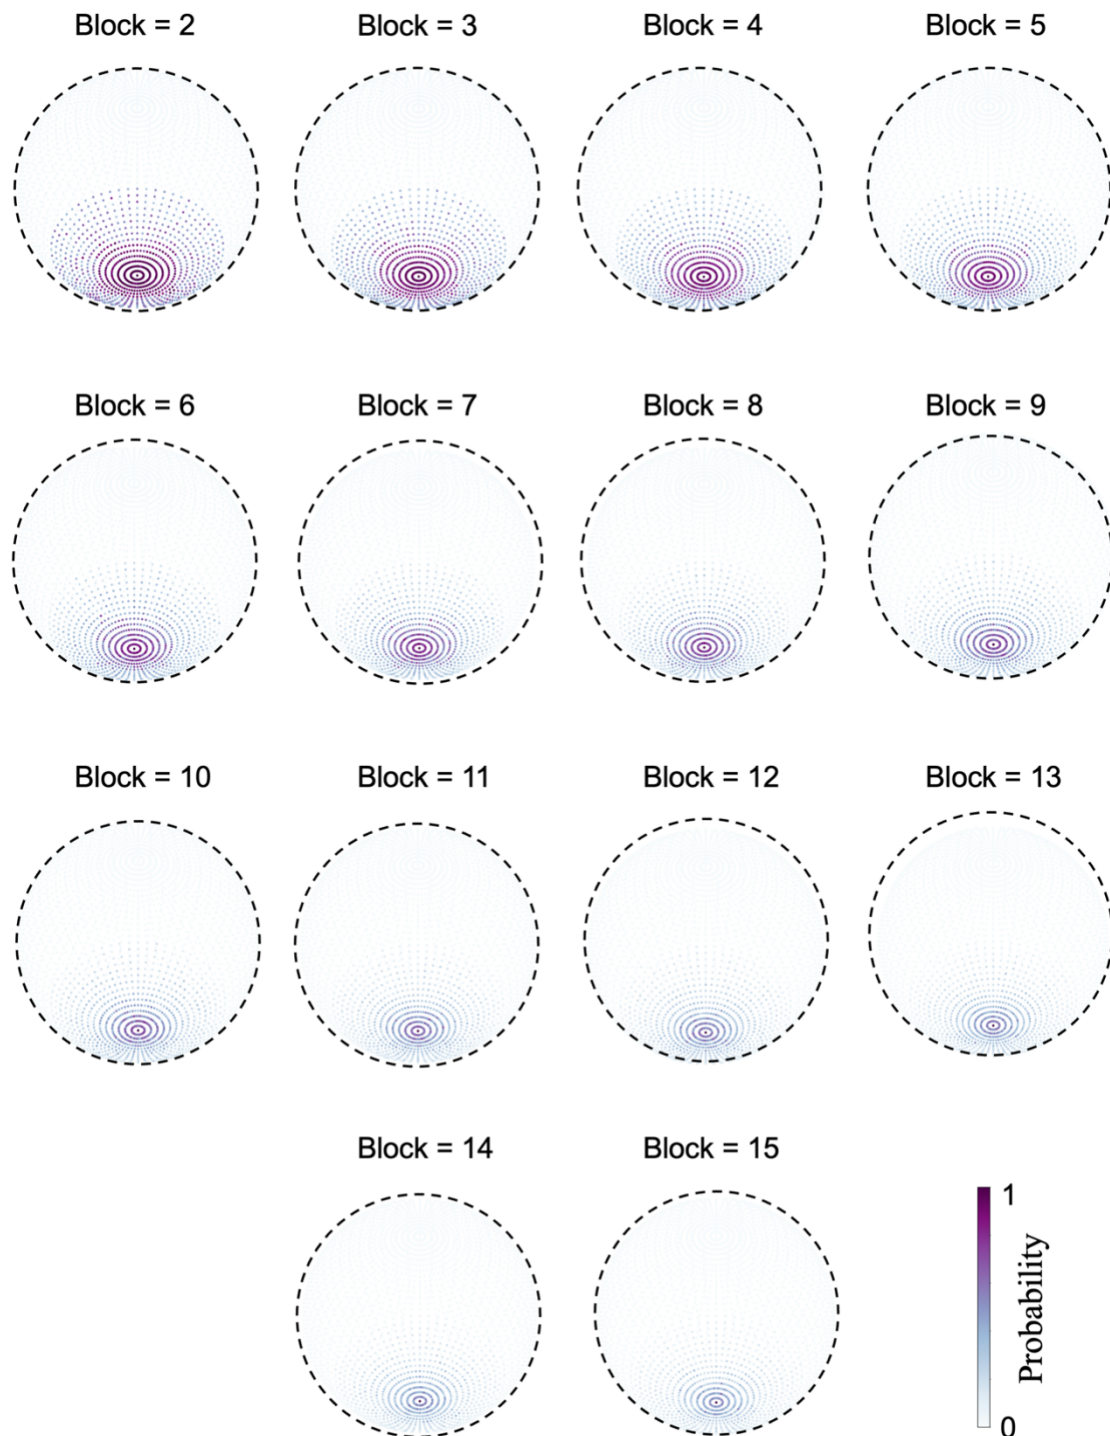

842

843 Extended Data Fig. 7 **The world models developed in the world containing stacks with different**

844 **numbers of blocks.** The number of blocks ranged from 2 to 15, and in all the worlds gravity's

845 direction was in Gaussian distributions with the vertical direction as the maximum likelihood. Note that

846 the world with stacks consisting of more block numbers led to smaller variances in the Gaussian

847 function.

848

849 **Extended Data Fig. 8**

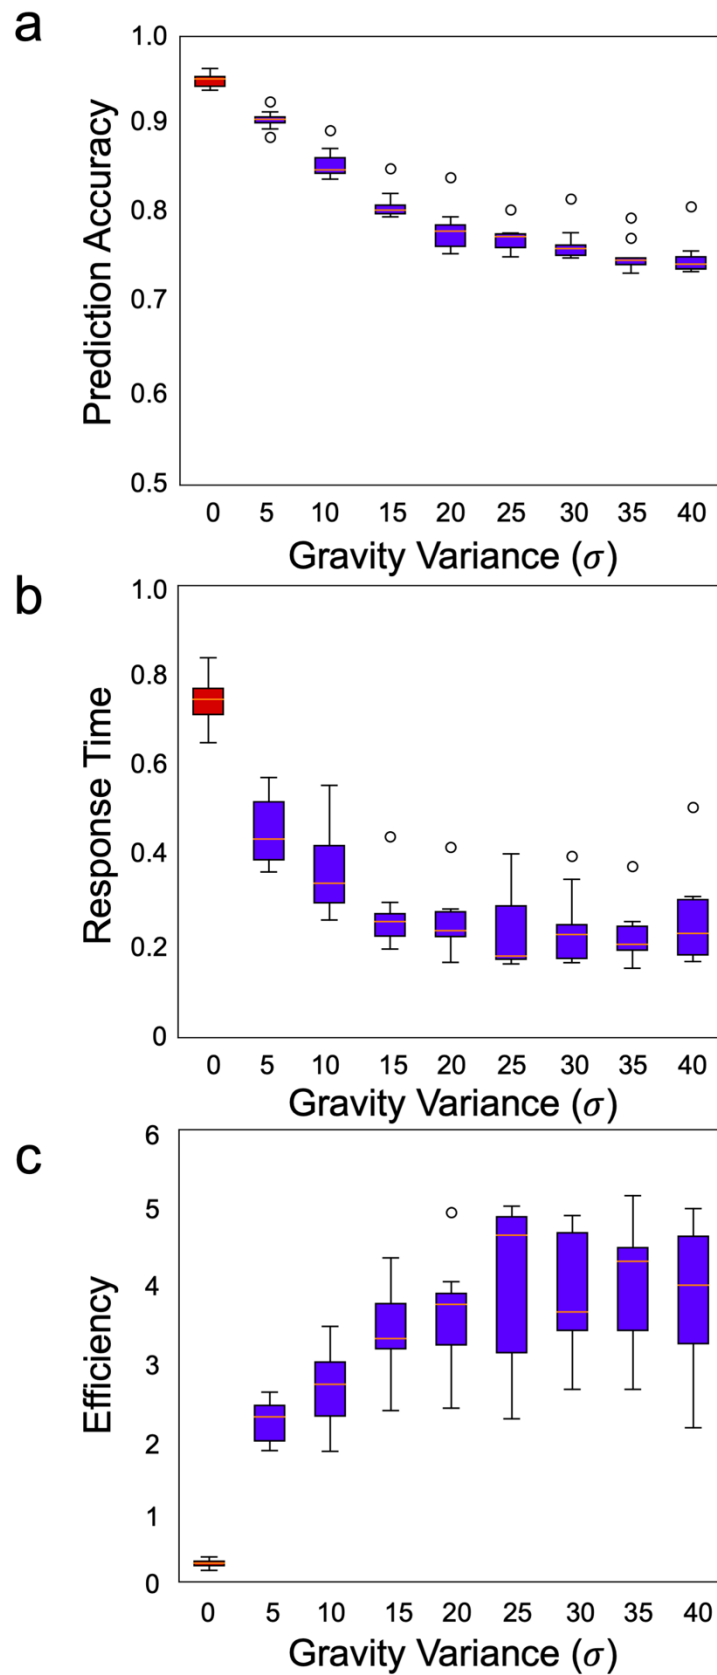

850

851 **Extended Data Fig. 8 Ecological advantage of the world model embodied with different Gaussian**

852 **functions.** a) Prediction accuracy decreased when the variance of the Gaussian function increased, and

853 reaches an asymptote of 0.75. b) Response time decreased as the variance increased, and reached an  
854 asymptote of 0.20. c) The prediction accuracy and response time was combined as a measurement for  
855 efficiency, which gradually increased monotonically as the function of the variance until an asymptote  
856 of 4. Red box: the world model embodied no stochastic characteristic (i.e., the deterministic model);  
857 Blue box: the world model with different levels of variances. Error bar: standard error.  
858

859 **Extended Data Fig.9**

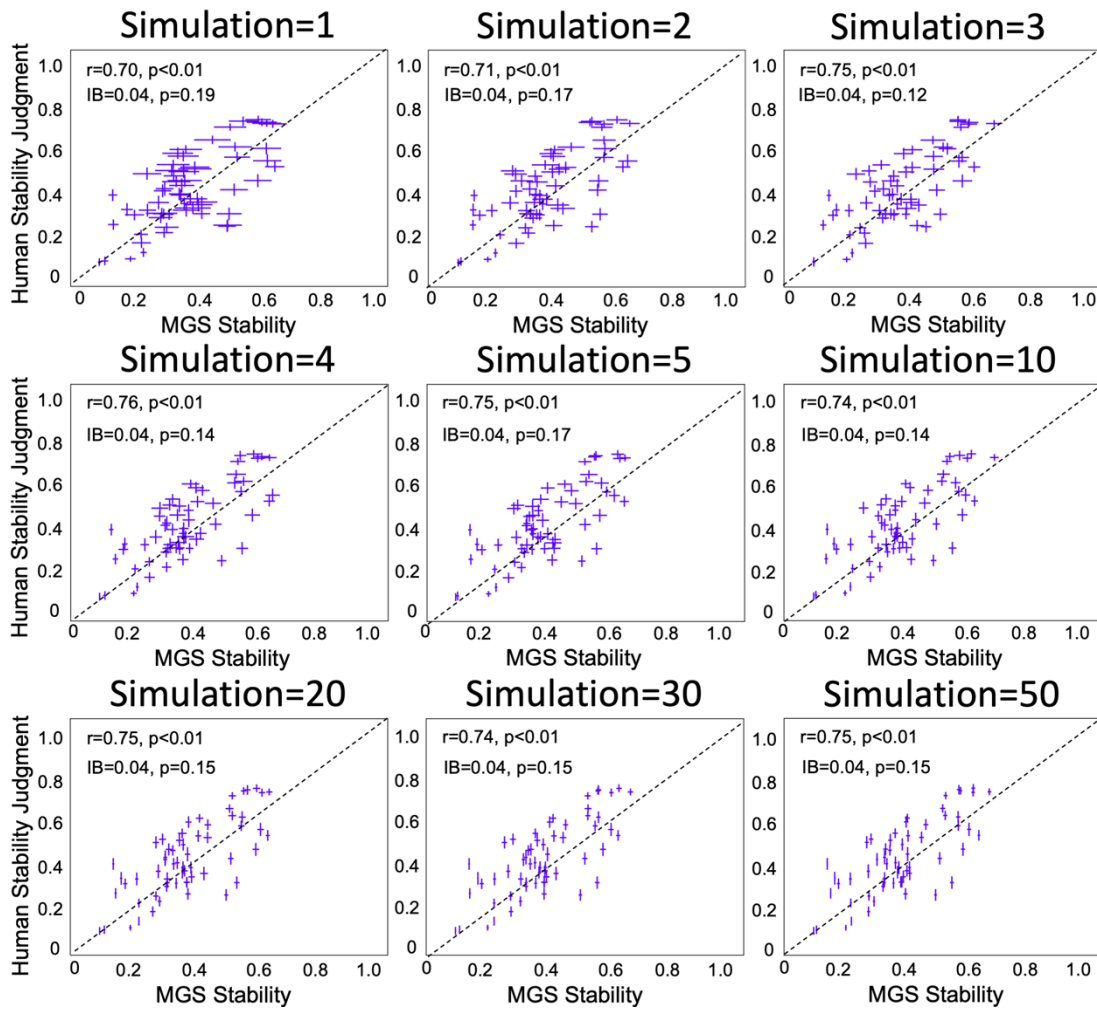

860

861 Extended Data Fig. 9 **The relation between the number of simulations and the variance of stability**  
862 **inference.** The simulation showed that the variance of stability inference decreased with the number of  
863 simulations. Note that the variance in the world model observed in participants best matched the  
864 variance when the simulation of the MGS was conducted three times.

865

866



867 **Appendix: Estimate the lower bound of the possible number of**  
 868 **configurations**

869 A configuration is a structure composed of several contact blocks. To simplify the  
 870 computation of estimating the number of possible configurations, here we constrained  
 871 the shape of blocks and the position where the blocks were placed.

872 *The shape constraint: the blocks used to form a configuration are all uniform*  
 873 *rectangular blocks with the same aspect ratio.*

874 *The position constraint: only one block is allowed to be placed on the same*  
 875 *layer of the configuration.*

876 Thus, the problem is then simplified to estimate the possible number of  
 877 configurations when only one rectangular block with the aspect ratio of  $\alpha: \beta: \gamma$  (i.e.,  
 878 **the shape constraint**) is allowed to place in one layer (i.e., **the position constraint**).  
 879 Note that the constraints significantly reduce the number of estimated configurations.

880 We illustrated our solution by starting with a simple case: the aspect ratio of  
 881 blocks is  $\alpha: \alpha: \alpha$ .

882

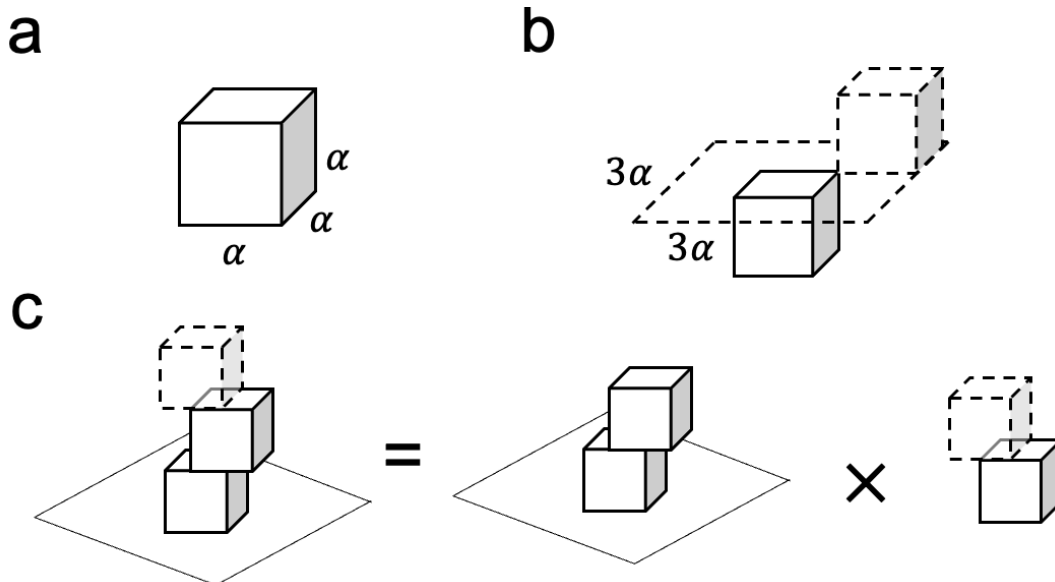

883

884 **Appendix Fig 1.** An illustration of the procedure to estimate the possible number of configurations  
 885 when blocks have an aspect ratio of  $\alpha: \alpha: \alpha$ . (a) the cubic block with the length, width and height are  $\alpha$ .  
 886 (b) Constructing a configuration by stacking two cubic blocks. The upper block could only be placed  
 887 within a  $3\alpha \times 3\alpha$  area to guarantee contact with the lower block. (c) A three-block configuration can  
 888 be viewed as stacking a cubic block on a two-block configuration.

889

890 **The condition when the aspect ratio of blocks is  $\alpha: \alpha: \alpha$**

891 The block with the aspect ratio of  $\alpha: \alpha: \alpha$  is a cube (Appendix Fig 1a). The  
 892 side length of the cube is defined as  $\alpha$ . Consider a configuration with two stacking  
 893 blocks, the upper block needs to be placed in a  $3\alpha \times 3\alpha$  area to ensure contact with  
 894 the bottom block (Appendix Fig 1b). To estimate the possible number of this simple  
 895 situation, we defined a visual acuity  $v$ , which is the minimum resolution to distinguish  
 896 two stacks (i.e., j.n.d.). Note that  $v$  is a small value and here we set it as  $v = 0.01$   
 897 to match the minimal position difference for stability estimation in the simulation  
 898 platform (please see Methods). Therefore, the possible number of the configuration  
 899 containing two cubic blocks is

$$N_{C2} = \left(\frac{2\alpha}{v}\right)^2 \quad (1)$$

900 Where  $N_{C2}$  indicates the possible number of configurations containing two cubic  
 901 blocks.

902 We further consider the situation with more cubic blocks. For a stack that  
 903 contains three cubic blocks, it can be viewed as placing a cubic block on a two-block  
 904 stack (Appendix Fig 1c). Therefore, the total possible number of configurations is the  
 905 multiplication of two two-block configurations, which is formulated as

$$N_{C3} = N_{C2} \times N_{C2} = N_{C2}^2$$

906 Similarly, the possible number of configurations for stacks containing four cubic  
 907 blocks is

$$N_{C4} = N_{C3} \times N_{C2} = N_{C2}^3$$

908 Accordingly, the possible number of configurations with M cubic blocks is

$$N_{CM} = N_{C(M-1)} \times N_{C2} = \dots = N_{C2}^{M-1} = \left(\frac{2\alpha}{\nu}\right)^{2M-2}, M \geq 2 \quad (2)$$

909 Now, we have introduced the basic idea of calculating the number of  
 910 configurations using a block with an  $\alpha: \alpha$  aspect ratio as a special case. Then we  
 911 generalized the idea to estimate the possible number when the block is rectangular  
 912 with the aspect ratio as  $\alpha: \beta: \beta$ .  
 913

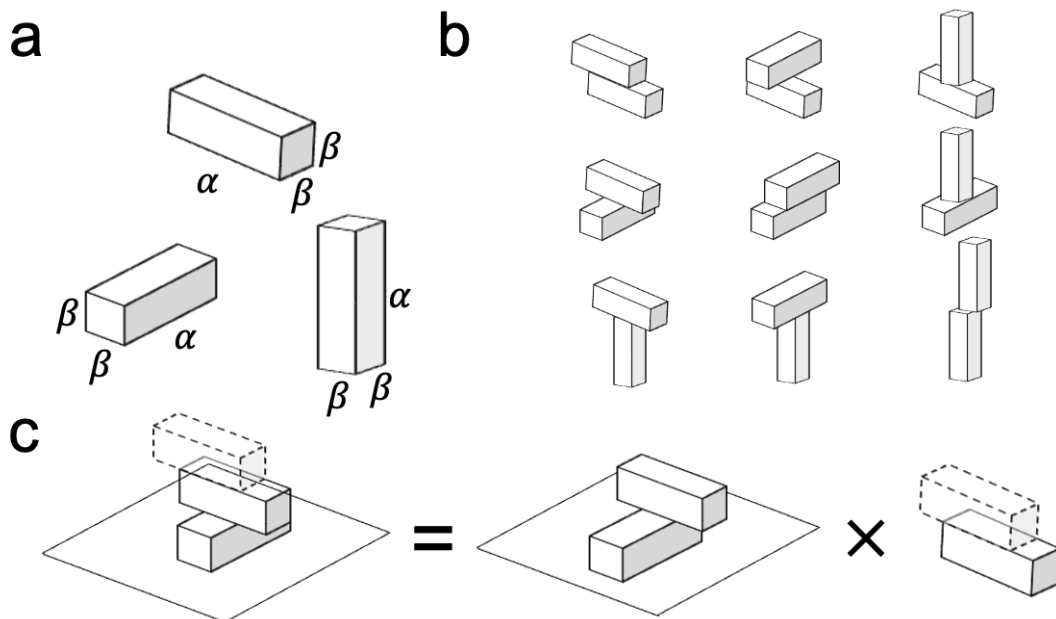

914 **Appendix Fig 2.** An illustration of the procedure to estimate the possible number of configurations  
 915 when blocks have the aspect ratio of  $\alpha: \beta: \beta$ . (a) Three types of rectangular blocks with an aspect ratio  
 916 of  $\alpha: \beta: \beta$ . (b) There are nine possible two-block configurations when combining blocks with an aspect  
 917 ratio of  $\alpha: \beta: \beta$ . (c) A three-block configuration could be viewed as stacking a cubic block on a two-  
 918 block configuration.  
 919

920

### 921 **The condition when the aspect ratio of blocks is $\alpha: \beta: \beta$**

922 A block with the aspect ratio of  $\alpha: \beta: \beta$  has three types, corresponding to the  
 923 sides of length, width and height are  $\alpha$  and the rest sides are  $\beta$  ( $\alpha: \beta: \beta$ ,  $\beta: \alpha: \beta$ , and  
 924  $\beta: \beta: \alpha$ ; see Appendix Fig 2a). For simplicity, we label the three basic blocks as A, B  
 925 and C. The three types of blocks can generate 9 (i.e.,  $3^2$ ) two-block configurations in  
 926 total (Appendix Fig 2b). We calculate each of the possible numbers of two-block  
 927 configurations below.

$$\mathbf{N}_{R2} = \begin{bmatrix} N_{AA} & N_{AB} & N_{AC} \\ N_{BA} & N_{BB} & N_{BC} \\ N_{CA} & N_{CB} & N_{CC} \end{bmatrix} \quad (3)$$

$$= \frac{1}{v^2} \begin{bmatrix} 4\alpha\beta & (\alpha + \beta)^2 & 2\beta(\alpha + \beta) \\ (\alpha + \beta)^2 & 4\alpha\beta & 2\beta(\alpha + \beta) \\ 2\beta(\alpha + \beta) & 2\beta(\alpha + \beta) & 4\beta^2 \end{bmatrix}$$

928 The possible number of configurations for stacks containing two rectangular  
929 blocks with the aspect ratio of  $\alpha: \beta: \beta$  is

$$N_{R2} = \sum \mathbf{N}_{R2} \quad (4)$$

930 For a configuration containing three blocks, it can be viewed as a block  
931 stacked on a two-block stack (Appendix Fig 2c). Therefore,

$$N_{R3} = N_{\cdot A} + N_{\cdot B} + N_{\cdot C} \quad (5)$$

932 Where  $N_{\cdot A}$  indicates the possible number when block A stacked at the upper layer,  
933 and each term can be expanded as below.

$$\begin{aligned} N_{\cdot A} &= N_{\cdot A} \times N_{AA} + N_{\cdot B} \times N_{BA} + N_{\cdot C} \times N_{CA} \\ N_{\cdot B} &= N_{\cdot A} \times N_{AB} + N_{\cdot B} \times N_{BB} + N_{\cdot C} \times N_{CB} \\ N_{\cdot C} &= N_{\cdot A} \times N_{AC} + N_{\cdot B} \times N_{BC} + N_{\cdot C} \times N_{CC} \end{aligned} \quad (6)$$

934 Combining equations (4), (5) and (6), we have

$$N_{R3} = \sum ([N_{\cdot A} \quad N_{\cdot B} \quad N_{\cdot C}] \times \begin{bmatrix} N_{AA} & N_{AB} & N_{AC} \\ N_{BA} & N_{BB} & N_{BC} \\ N_{CA} & N_{CB} & N_{CC} \end{bmatrix})$$

935 And

$$[N_{\cdot A} \quad N_{\cdot B} \quad N_{\cdot C}] = [1 \quad 1 \quad 1] \times \begin{bmatrix} N_{AA} & N_{AB} & N_{AC} \\ N_{BA} & N_{BB} & N_{BC} \\ N_{CA} & N_{CB} & N_{CC} \end{bmatrix}$$

936 Therefore,

$$N_{R3} = \sum (\mathbf{N}_{R2}^2) \quad (7)$$

937 Following a similar logic, the possible number of configurations containing M blocks  
938 with an aspect ratio of  $\alpha: \beta: \beta$  is

$$N_{RM} = \sum (\mathbf{N}_{R2}^{M-1}), M \geq 2 \quad (8)$$

939

#### 940 **The aspect ratio of blocks is $\alpha: \beta: \gamma$**

941 We further generalize the problem by considering the aspect ratio of blocks as  
942  $\alpha: \beta: \gamma$ . This forms six different types:  $\alpha: \beta: \gamma$ ,  $\alpha: \gamma: \beta$ ,  $\beta: \alpha: \gamma$ ,  $\beta: \gamma: \alpha$ ,  $\gamma: \alpha: \beta$ ,  $\gamma: \beta: \alpha$ ,  
943 for each type the three proportional values corresponding to length, width and height,  
944 respectively. We label the six types of blocks as A, B, C, D, E, F, and G for  
945 simplicity.

946 Following the similar logic as above, different types of blocks generated 36  
947 (i.e.,  $6^2$ ) two-block configurations in total, and the possible number of each two-block  
948 configuration is

$$\mathbf{N}_{R2} = \begin{bmatrix} N_{AA} & N_{AB} & N_{AC} & N_{AD} & N_{AE} & N_{AF} \\ N_{BA} & N_{BB} & N_{BC} & N_{BD} & N_{BE} & N_{BF} \\ N_{CA} & N_{CB} & N_{CC} & N_{CD} & N_{CE} & N_{CF} \\ N_{DA} & N_{DB} & N_{DC} & N_{DD} & N_{DE} & N_{DF} \\ N_{EA} & N_{EB} & N_{EC} & N_{ED} & N_{EE} & N_{EF} \\ N_{FA} & N_{FB} & N_{FC} & N_{FD} & N_{FE} & N_{FF} \end{bmatrix} \quad (9)$$

$$= \frac{1}{v^2} \begin{bmatrix} 4\alpha\beta & 2\alpha(\beta + \gamma) & (\alpha + \beta)^2 & (\alpha + \beta)(\beta + \gamma) & (\alpha + \gamma)(\alpha + \beta) & 2\beta(\alpha + \gamma) \\ 2\alpha(\beta + \gamma) & 4\alpha\gamma & (\alpha + \beta)(\alpha + \gamma) & 2\gamma(\alpha + \beta) & (\alpha + \gamma)^2 & (\alpha + \gamma)(\beta + \gamma) \\ (\alpha + \beta)^2 & (\alpha + \beta)(\alpha + \gamma) & 4\alpha\beta & 2\beta(\alpha + \gamma) & 2\alpha(\beta + \gamma) & (\alpha + \beta)(\beta + \gamma) \\ (\alpha + \beta)(\beta + \gamma) & 2\gamma(\alpha + \beta) & 2\beta(\alpha + \gamma) & 4\beta\gamma & (\beta + \gamma)(\alpha + \gamma) & (\beta + \gamma)^2 \\ (\alpha + \beta)(\alpha + \gamma) & (\alpha + \gamma)^2 & 2\alpha(\beta + \gamma) & (\alpha + \gamma)(\beta + \gamma) & 4\alpha\gamma & 2\gamma(\alpha + \beta) \\ 2\beta(\alpha + \gamma) & (\alpha + \gamma)(\beta + \gamma) & (\alpha + \beta)(\beta + \gamma) & (\beta + \gamma)^2 & 2\gamma(\alpha + \beta) & 4\beta\gamma \end{bmatrix}$$

949

950

951

The possible number of configurations for stacks with M blocks with an aspect ratio  $\alpha: \beta: \gamma$  is

$$N_{RM} = \sum (N_{R2}^{M-1}), M \geq 2 \quad (10)$$

952

953

954

955

Therefore, we can estimate the possible number of configurations when only one rectangular block with the aspect ratio of  $\alpha: \beta: \gamma$  is allowed to place in each layer using the formula (9) and (10).

956

957

958

959

960

961

Finally, in this study we chose blocks with an aspect ratio of 3:1:1 as building blocks for stacks whose stability was evaluated. Specifically, for stacks consisting of 10 blocks and j.n.d. of  $v = 0.01$ , the number of configurations can be estimated with formula (9), which is  $3.72 \times 10^{19}$ .

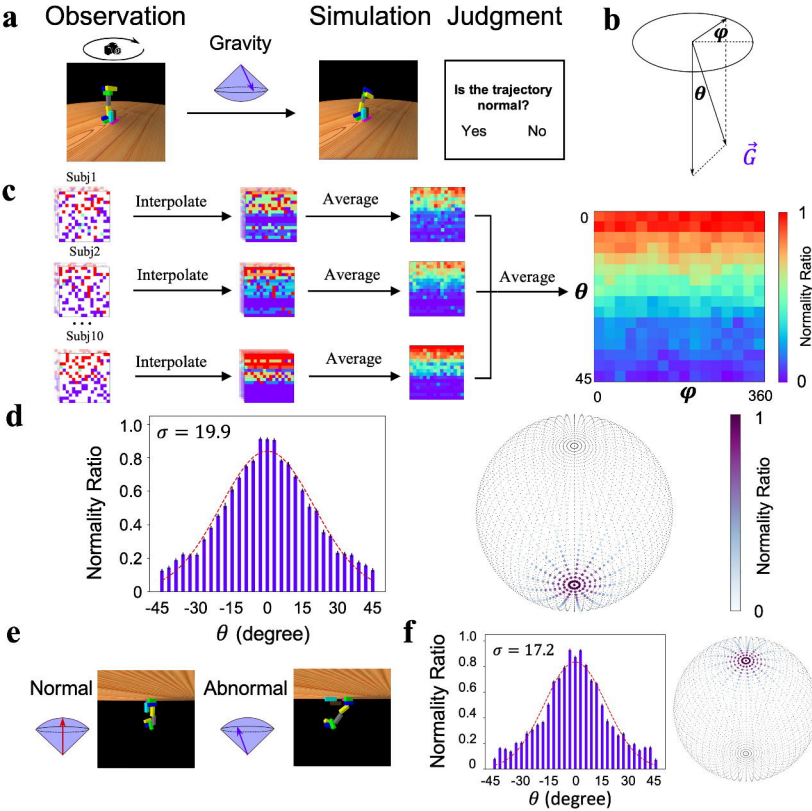

**a** Observation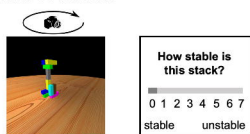

Stable

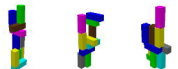

Unstable

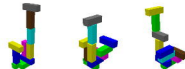**b** Natural Gravity Simulator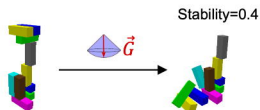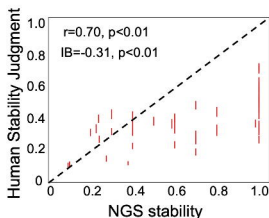**c** Mental Gravity Simulator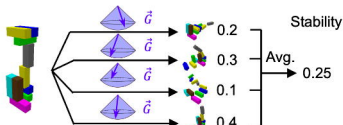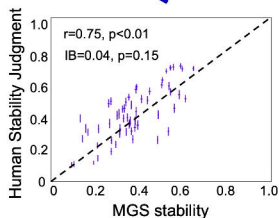**d**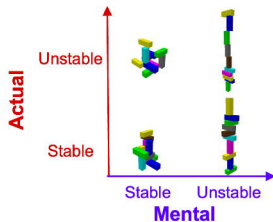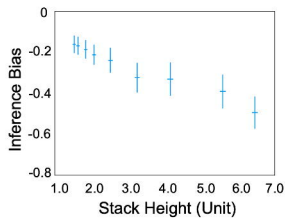

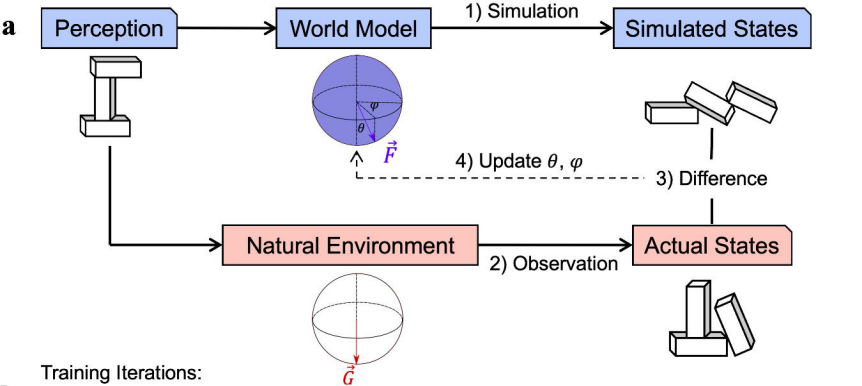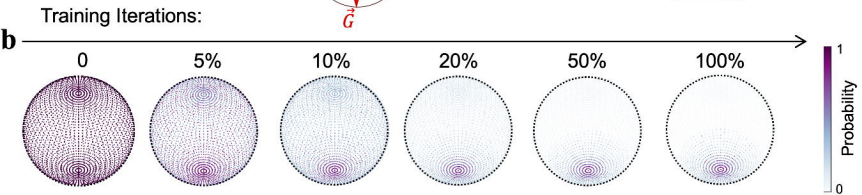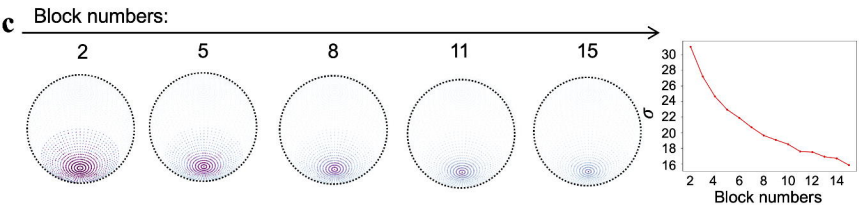

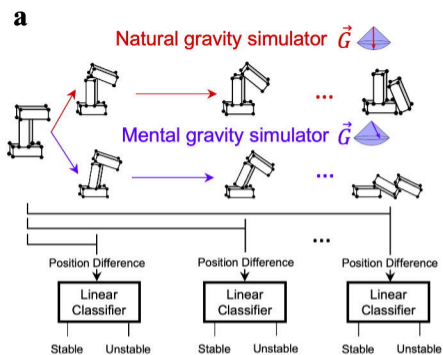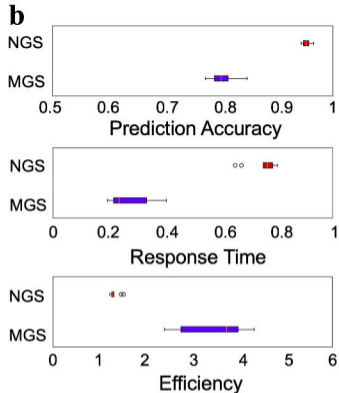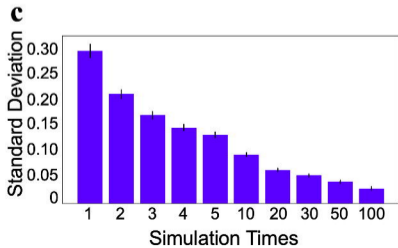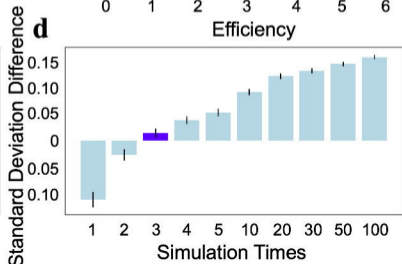

Source: https://www.biorxiv.org/content/10.1101/2022.12.30.522364v2.full.pdf
